# Supplementary material for: Using centennial changes in plant, butterfly and bird diversity to inform restoration targets
Source: Research Square preprint supplement (doi:10.21203/rs.3.rs-6887670/v1), 2025-09-23
Supplement: Supplementary file 1 [file 85745a3a5468b788268ffdc2.docx]

**Supplementary Information**

**Supplementary information S1:** Plant and butterfly locality information (size (km2) and current share of habitat types are given). The remaining area consist of arable fields, built-up area, infrastructure etc. See Supplementary Information S2 for time period of historical plant data.

| Locality number | Locality name | Taxa | Size (km2) | Forest (%) | Fen (%) | Bog (%) | Salt marsh (%) | Lake (%) | Grassland (%) | Heath (%) |
| --- | --- | --- | --- | --- | --- | --- | --- | --- | --- | --- |
| 1 | Simested | Plant, butterfly | 9.98 | 16.4 | 22.8 | 4.0 |  | 1.0 | 2.0 |  |
| 2 | Pamhule Skov | Plant | 4.59 | 78.6 | 5.4 | 3.3 |  | 10.1 | 0.3 |  |
| 3 | Sorø Sønderskov | Plant, butterfly | 9.40 | 87.1 | 6.3 | 2.1 |  | 0.4 |  |  |
| 4 | Allindelille | Plant, butterfly | 1.20 | 92.1 |  | 7.1 |  | 3.9 | 3.9 |  |
| 5 | Jægerspris Nordskov | Plant, butterfly | 19.70 | 63.1 | 2.0 | 4.1 | 9.6 | 0.6 | 4.8 |  |
| 6 | Færgelunden | Plant, butterfly | 1.73 | 88.3 |  | 3.4 | 4.4 |  |  |  |
| 7 | Tisvilde Hegn and Melby Overdrev | Plant, butterfly | 29.75 | 59.8 | 1.2 | 7.7 |  | 1.6 | 2.4 | 7.8 |
| 8 | Gribskov | Plant, butterfly | 55.22 | 86.7 | 0.9 | 9.5 |  | 1.1 | 0.8 |  |
| 9 | Jonstrup Vang | Plant | 2.54 | 74.4 | 0.1 | 7.9 |  | 3.0 | 0.9 |  |
| 10 | Køge Ås | Plant, butterfly | 1.56 | 60.3 | 8.8 | 17.1 |  | 1.4 | 0.6 |  |
| 11 | Høje Møn | Plant, butterfly | 9.96 | 77.0 | 0.1 | 1.5 |  | 1.8 | 6.4 |  |

**Supplementary information S2:** Historical vascular plant presence-only data from literature published in the period 1790-1947

| **Locality** | **Author** | **Recording year** | **Published in** | **No of species records** | **Type of data** |
| --- | --- | --- | --- | --- | --- |
| **Simested** | Salomon Drejer | 1836-38 | Unpublished field notebook “Annotationes botanicæ factæ initinere in Jyllandia” (Royal Library, Copenhagen) | 178 | Foray |
|  | Salomon Drejer | 1840 | Lange, M.T., 1870. Manuscript “Fortegnelse over de i S. Drejers Herbarium (tilhørerende Sorø Akademi) indeholdte Planter” (Natural History Museum of Denmark, Copenhagen) | 149 | Foray |
|  | Kai Gram, C. A. Jørgensen and Mogens Køie | 1916 | Gram, K., Jørgensen, C.A., Køie, M., 1944. De jydske Egekrat og deres Flora. Biologiske Skrifter / Kongelige Danske Videnskabernes Selskab 3, 1-210. | 75 | Survey |
| **Pamhule Skov** | Rudolph von Fischer-Bentzon | 1871-72 | Fischer-Benzon, R.v. & Steinvorth, J., 1873. Ueber die Flora der Umgegend von Hadersleben, Tabellen zur Bestimmen die um Hadersleben wildwachsenden oder im Freien gezogenen Gefässpflanzen, Hadersleben. Programm der lateinischen Schule zu Hadersleben für das Schuljahr 1872-1873. | 104 | Foray |
|  | Johan M. C. Lange and Hans Mortensen | 1879-83 | Lange, J., Mortensen, H., 1885. Oversigt over de i Aarene 1879-83 i Danmark fundne sjeldnere eller for den danske Flora nye Arter. Botanisk Tidsskrift 14, 54-146. | 6 | Foray |
|  | Kai Gram | 1947 | Gram, K., 1949. Højsommerekskursionen 5.-8. August 1947. Botanisk Tidsskrift 48, 333-336. | 19 | Foray |
| **Sorø Sønderskov + Flommen** | Jakob Hornemann Bredsdorff | c. 1830 | Bredsdorff, J.H., 1834-1835. Haandbog ved botaniske Excursioner i Egnen om Sorøe. Andreas Seidelin, Kjøbenhavn. | 157 | Foray |
|  | Peter Nielsen | 1865 | Nielsen, P., 1866. »Flommen« ved Sorø. Botanisk Tidsskrift 1: 225-229. | 82 | Survey |
|  | Peter Nielsen | 1860-1871 | Nielsen P. (1872) Sydvestsjællands Vegetation. Botanisk Tidsskrift 6: 261-388. | 104 | Foray |
|  | Peter Nielsen | 1876 | Nielsen, P., 1876. Beretning om Botanisk Forenings Exkursion til Sorø d. 5. september 1874. Botanisk Tidsskrift 8, 221. | 10 | Foray |
| **Allindelille Fredskov** | Bernhard C. Kamphøvener | 1835 | Unpublished field notebook (Natural History Museum of Denmark, Copenhagen) | 5 | Foray |
|  | Johan M. C. Lange | 1878 | Lange, J., 1879. [Beretning om Botanisk Forenings Exkursion] Den 8de september 1878 til Allindelille Skov. Botanisk Tidsskrift 11: 18-20. | 71 | Foray |
|  | Emil Rostrup | 1897 | Rostrup, E., 1897. Exkursionen til Skovene ved Borup og Allindelille den 19.- 20. Juni 1897. Botanisk Tidsskrift 21, XXII-XXIII. | 17 | Foray |
|  | Christian E. O. Jensen | 1911 | Jensen, C., 1911. Floristik fra Allindelille Fredskov, In Biologiske Arbejder tilegnede Eug. Warming paa hans 70 Aars Fødselsdag den 3. Nov. 1911. ed. L. Kolderup Rosenvinge, pp. 57-72. H. Hagerups Forlag, København. | 351 | Survey |
|  | Christian E. O. Jensen | 1919 | Jensen, C., 1919. Ekskursionen til Allindelille Fredskov d. 15. Juni 1919. Botanisk Tidsskrift 37, 54-55. | 39 | Foray |
|  | Carl C. F. Ferdinandsen | 1915 | Ferdinandsen, C., 1915. Naturhistorisk Forening for Sjællands Ekskursion til Allindelille Fredskov 6. Juni 1915. Flora og Fauna 1915, 113-116. | 33 | Foray |
|  | Tyge W.Böcher | c. 1940 | Böcher, T.W. (1945) | 103 | Plot-based |
|  | Christen Raunkiær | 1911 1920 | Raunkiær, C., 1935. Allindelille Fredskov: statistical investigations of the plant formations, In: Botaniske Studier, 3. hæfte. ed. C. Raunkiær, pp. 165-226. J.H. Schultz Forlag, København. | 356 | Plot-based |
| **Jægerspris Nordskov** | Hans Mortensen | 1879 | Mortensen, H., 1880. [Beretning om Botanisk Forenings Exkursion] Den 14de September 1879 til Jægersprisegnen. Botanisk Tidsskrift 12, 7-9. | 13 | Foray |
|  | Axel Lange | 1908 | Lange, A., 1908. Ekskursionen til Frederikssund og Hornsherred d. 20.-21. Juni 1908. Botanisk Tidsskrift 29, 90-94. | 245 | Foray |
|  | Knud Wiinstedt | 1915 | Wiinstedt, K., 1916. Jægersprisegnen (Genfundet af Thesium ebracteatum). Flora og Fauna 1916, 97-104. | 35 | Foray |
|  | Johannes Grøntved | 1918-20 | Grøntved, J., 1927. Formationsstatistiske Undersøgelser paa nogle danske Overdrev. Botanisk Tidsskrift 40, 1-71. | 86 | Plot-based |
|  | Eiler Høeg | 1928 | Høeg, E., 1929. Exkursionen til Jægerspris-Egnen d. 16. September 1928. Botanisk Tidsskrift 40, 463-464. | 64 | Foray |
|  | Tyge W. Böcher | c. 1943 | Böcher, T.W. (1945) | 88 | Plot-based |
| **Færgelunden** | Tyge W. Böcher | c. 1940 | Böcher, T.W. (1945) Beiträge zur Pflanzengeographie und Ökologie Dänischer Vegetation, II. Über die Waldsaum- und Graskrautgesellschaften trockener und halbtrockener Böde. - Biologiske Skrifter / Kongelige Danske Videnskabernes Selskab 4(1): 1-163. | 47 | Plot-based |
|  | Bernhard C. Kamphøvener | 1836 | Lange, J., 1897. Til Erindring om Botanikeren B. Kamphøvener. Botanisk Tidsskrift 21, 237-263. | 15 | Foray |
|  | Hans Mortensen | 1879 | Mortensen, H., 1880. [Beretning om Botanisk Forenings Exkursion] Den 14de September 1879 til Jægersprisegnen. Botanisk Tidsskrift 12, 7-9. | 5 | Foray |
|  | E. Rostrup | 1895 | Rostrup, E., 1895. Extra-Exkursionen 19. Maj 1895 [til Færgelunden]. Botanisk Tidsskrift 20, IV. | 4 | Foray |
|  | Axel Lange | 1908 | Lange, A., 1908. Ekskursionen til Frederikssund og Hornsherred d. 20.-21. Juni 1908. Botanisk Tidsskrift 29, 90-94. | 7 | Foray |
|  | C. H. Ostenfeld | 1911 | Ostenfeld, C.H., 1912. Ekskursionen til Færgelunden ved Jægerspris d. 8. Oktober 1911. Botanisk Tidsskrift 33, 85. | 20 | Foray |
|  | Wiinstedt | 1915 | Wiinstedt, K., 1916. Jægersprisegnen (Genfundet af Thesium ebracteatum). Flora og Fauna 1916, 97-104. | 28 | Foray |
| **Tisvilde-Melby** | Jens Wilken Hornemann | 1825 | Mortensen, H. (1872) Nordostsjællands Flora. Botanisk Tidsskrift 5: 8-168. | 7 | Foray |
|  | Salomon Drejer | 1840 | Lange, M.T., 1870. Manuscript “Fortegnelse over de i S. Drejers Herbarium (tilhørerende Sorø Akademi) indeholdte Planter” (Natural History Museum of Denmark, Copenhagen) | 10 | Foray |
|  | Hans Mortensen | c. 1870 | Mortensen, H. (1872) Nordostsjællands Flora. Botanisk Tidsskrift 5: 8-168. | 111 | Foray |
|  | Hans Mortensen | 1890 | Mortensen, H., 1890. Tisvilde Hegn, In: Festskrift udgivet af Den botaniske Forening i Kjøbenhavn i Anledning af dens Halvhundredaarsfest. pp. 169-181. Hoffensberg & Trap, Kjøbenhavn. | 169 | Survey |
|  | Peter Mikkel Pedersen | 1894 | Pedersen, P. M. (1894) Tisvilde. Flora og Fauna 1894: 17-18. | 8 | Foray |
|  | Carl Christensen | 1919 | Christensen, C., 1919. Ekskursionen til Adserbo d. 1. Juni 1919. Botanisk Tidsskrift 37, 54. | 11 | Foray |
|  | Carl Christensen | 1922 | Christensen, C., 1922. Exkursionen til Tisvilde Hegn d. 25. September 1921. Botanisk Tidsskrift 37, 330-331. | 9 | Foray |
|  | Tyge W. Böcher | c. 1942 | Böcher, T.W. (1945) | 20 | Survey |
| **Gribskov** | Hans Mortensen | 1897 | Mortensen, H., 1897. Plantevæxten i Grib Skov, In Grib Skov, et Stykke dansk Natur. ed. E. Reumert, pp. 169-181, Kjøbenhavn. | 375 | Survey |
|  | Christian E. O. Jensen | 1880 | Jensen, C., 1882. [Beretning om Botanisk Forenings Exkursion] Den 19de Septb. 1880 til Gribskov. Botanisk Tidsskrift 13, 4-5. | 7 | Foray |
|  | Henning E. Petersen | c. 1915 | Petersen, H.E., Jessen, K., Ferdinandsen, C., Olsen, C., Hagerup, O., 1918. Maglemose i Gribskov II. Floralister. Botanisk Tidsskrift 36, 75-80. | 36 | Plot-based |
| **Jonstrup Vang** | Hans Mortensen | 1862-72 | Mortensen, H. (1872) Nordostsjællands Flora. Botanisk Tidsskrift 5: 8-168. | 200 | Foray |
|  | Hans Mortensen | 1874 | Mortensen, H., 1876. [Beretning om Botanisk Forenings Exkursion] Den 14de Juni 1874 til Jonstrup-Vang, Søndersøen og Kollekolle. Botanisk Tidsskrift 7, 216-217. | 21 | Foray |
|  | Hans Mortensen | 1881 | Mortensen, H., 1882. [Beretning om Botanisk Forenings Exkursion] Den 19de Juni 1881 til Ravnholt Skov, Jonstrup Vang og Søndersøen. Botanisk Tidsskrift 13, 5-7. | 15 | Foray |
|  | Christen Raunkiær | 1908 | Raunkiær, C., 1909. Formationsundersøgelse og Formationsstatistik. Botanisk Tidsskrift 30, 20-132. | 464 | Plot-based |
|  | Tyge W. Böcher | c. 1942 | Böcher, T.W. (1945) | 11 | Plot-based |
| **Køge Ås** | Bernhard C. Kamphøvener | 1835 | Unpublished field notebook (Natural History Museum of Denmark, Copenhagen) | 65 | Foray |
|  | Johan M. C. Lange | 1878 | Lange, J., 1879. [Beretning om Botanisk Forenings Exkursion] Den 2den juni 1878 til Køge Ås og Lellinge. Botanisk Tidsskrift 11, 11-12. | 15 | Foray |
|  | Knud Wiinstedt | 1925 | Wiinstedt, K., 1925. Exkursionen til Køge Aas og Lellinge Skovene d. 10. Maj 1925. Botanisk Tidsskrift 38, 418-419. | 27 | Foray |
| **Høje Møn** | Emil Petit | 1883 | Petit, E. (1883) Manuscript ”Fortegnelse over Møens Pfanerogamer og Kryptogamer” (Natural History Museum of Denmark, Copenhagen) | 133 | Foray |
|  | Bernhard C. Kamphøvener | 1835 | Lange, J., 1897. Til Erindring om Botanikeren B. Kamphøvener. Botanisk Tidsskrift 21, 237-263. | 104 | Foray |
|  | Salomon Drejer | 1840 | Lange, M.T., 1870. Manuscript “Fortegnelse over de i S. Drejers Herbarium (tilhørerende Sorø Akademi) indeholdte Planter” (Natural History Museum of Denmark, Copenhagen) | 48 | Foray |
|  | Hans Mortensen | 1877 | Mortensen, H., 1879. [Beretning om Botanisk Forenings Exkursion] Den 15de-17de Juni 1877 til Møens Klint. Botanisk Tidsskrift 11, 1-4. | 38 | Foray |
|  | Emil Rostrup | 1901 | Rostrup, E. (1902) Nogle Meddelelser angaaende Møens Vegetation. Botanisk Tidsskrift 24: LII-LIII. | 14 | Foray |
|  | Carl Christensen | 1922 | Christensen, C., 1922. Om Vegetationen paa Høvblege. Botanisk Tidsskrift 37, 421-432. | 171 | Survey |
|  | Svend Andersen | c. 1930 | Andersen, S., 1936. Danske Vegetationsbilleder 15. Jydelejet ved Hunosøgaard. Flora og Fauna 43, 33-41. | 150 | Survey |
|  | Tyge W. Böcher | 1944 | Böcher, T.W., 1946. Græs-Urte-Vegetationen på Høje Møn. Botanisk Tidsskrift 48, 1-45. | 625 | Plot-based |

**Supplementary information S3:** False-positive and false-negative registrations of butterflies at each of the 9 localities and three periods included in the study.

| False-negatives | Period | | |
| --- | --- | --- | --- |
| Locality | 1900-1949 | 1950-1999 | 2000-2019 |
| Gribskov | 1 | 0 | 0 |
| Tisvilde | 0 | 0 | 0 |
| Jægerspris Nordskov | 2 | 0 | 0 |
| Færgelunden | 10 | 12 | 0 |
| Køge Ås | 10 | 3 | 0 |
| Allindelille | 6 | 0 | 0 |
| Sorø Sønderskov | 13 | 0 | 0 |
| Høje Møn | 2 | 2 | 0 |
| Simested | 27 | 3 | 0 |
|  |  |  |  |
| False-positives | Period | | |
| Locality | 1900-1949 | 1950-1999 | 2000-2019 |
| Gribskov | 3 | 1 | 2 |
| Tisvilde | 2 | 3 | 4 |
| Jægerspris Nordskov | 1 | 3 | 2 |
| Færgelunden | 0 | 0 | 1 |
| Køge Ås | 1 | 1 | 2 |
| Allindelille | 1 | 1 | 3 |
| Sorø Sønderskov | 0 | 2 | 1 |
| Høje Møn | 6 | 5 | 7 |
| Simested | 0 | 0 | 0 |

**Supplementary information S4:** **Bird trait list.** Latin name, population trend (Trend, I=increasing (positive trend), D=decreasubg (negative trend) as reported in Table 1 in Meltofte et al. 2021), main habitat, density of vegetation preferred in the habitat (vegetation structure, 1=dense, 2=semi-open, 3=open), level of migration (migration, 1=sedentary, 2=partially migratory, 3=migratory), the most important trophic level (herbivore, carnivore (including both carnivores and insectivores), omnivore), maximum latitudinal extent of species range (Max. latitude, decimal degrees).

| **Latin name** | **Trend** | **Habitat** | **Vegetation structure** | **Migration** | **Trophic level** | **Max.Latitude** |
| --- | --- | --- | --- | --- | --- | --- |
| Branta leucopsis | I | Grassland | 3 | 3 | Herbivore | 79.81 |
| Lyrurus tetrix | D | Forest | 3 | 1 | Herbivore | 70.02 |
| Perdix perdix | D | Grassland | 3 | 1 | Herbivore | 66.1 |
| Columba oenas | I | Woodland | 3 | 1 | Herbivore | 66.31 |
| Columba palumbus | I | Woodland | 2 | 1 | Herbivore | 70.14 |
| Streptopelia turtur | I | Woodland | 2 | 3 | Herbivore | 64.73 |
| Apus apus | I | Human Modified | 1 | 3 | Carnivore | 69.95 |
| Cuculus canorus | D | Forest | 2 | 3 | Carnivore | 71.25 |
| Rallus aquaticus | I | Wetland | 1 | 2 | Carnivore | 63.76 |
| Crex crex | D | Grassland | 2 | 3 | Carnivore | 66.5 |
| Porzana porzana | D | Wetland | 1 | 3 | Omnivore | 65.92 |
| Ciconia nigra | D | Woodland | 2 | 3 | Carnivore | 63.08 |
| Ciconia ciconia | D | Grassland | 3 | 3 | Carnivore | 60.04 |
| Ardea cinerea | I | Wetland | 3 | 1 | Carnivore | 70.43 |
| Platalea leucorodia | I | Wetland | 3 | 2 | Carnivore | 57.34 |
| Pluvialis apricaria | D | Grassland | 3 | 3 | Carnivore | 73.69 |
| Charadrius hiaticula | D | Coastal | 3 | 2 | Carnivore | 83.63 |
| Charadrius dubius | I | Wetland | 3 | 3 | Carnivore | 68.39 |
| Charadrius alexandrinus | D | Coastal | 3 | 2 | Carnivore | 56.69 |
| Vanellus vanellus | D | Wetland | 3 | 2 | Carnivore | 71.19 |
| Arenaria interpres | D | Coastal | 3 | 3 | Carnivore | 83.11 |
| Calidris pugnax | D | Wetland | 3 | 3 | Carnivore | 75.23 |
| Calidris alpina | D | Wetland | 3 | 3 | Carnivore | 79.36 |
| Scolopax rusticola | I | Forest | 3 | 3 | Carnivore | 70.44 |
| Gallinago media | D | Wetland | 3 | 3 | Carnivore | 69.33 |
| Gallinago gallinago | D | Wetland | 3 | 3 | Carnivore | 72.67 |
| Tringa ochropus | I | Wetland | 3 | 3 | Carnivore | 69.47 |
| Tringa totanus | D | Wetland | 3 | 3 | Carnivore | 71.19 |
| Tringa glareola | D | Wetland | 3 | 3 | Carnivore | 71.42 |
| Ichthyaetus melanocephalus | I | Coastal | 3 | 2 | Carnivore | 56.28 |
| Larus fuscus | I | Coastal | 3 | 2 | Carnivore | 77.89 |
| Larus argentatus | I | Coastal | 3 | 2 | Carnivore | 71.19 |
| Larus marinus | I | Coastal | 3 | 2 | Omnivore | 79.87 |
| Sternula albifrons | D | Coastal | 3 | 3 | Carnivore | 66.08 |
| Gelochelidon nilotica | D | Coastal | 3 | 3 | Carnivore | 55.34 |
| Chlidonias niger | D | Wetland | 3 | 3 | Carnivore | 63.05 |
| Sterna paradisaea | D | Coastal | 3 | 3 | Carnivore | 83.11 |
| Circus cyaneus | D | Grassland | 3 | 3 | Carnivore | 73.38 |
| Tyto alba | I | Human Modified | 3 | 1 | Carnivore | 58.07 |
| Athene noctua | D | Human Modified | 3 | 1 | Carnivore | 57.82 |
| Asio otus | I | Forest | 2 | 2 | Carnivore | 70.53 |
| Asio flammeus | D | Grassland | 3 | 3 | Carnivore | 74.25 |
| Upupa epops | D | Grassland | 3 | 3 | Carnivore | 60.04 |
| Jynx torquilla | I | Woodland | 1 | 3 | Carnivore | 70.27 |
| Picus viridis | D | Forest | 2 | 1 | Carnivore | 66.96 |
| Dendrocopos minor | I | Forest | 1 | 1 | Carnivore | 70.75 |
| Dendrocopos medius | D | Woodland | 1 | 1 | Carnivore | 59.64 |
| Dendrocopos major | I | Woodland | 1 | 1 | Omnivore | 68.6 |
| Coracias garrulus | D | Woodland | 2 | 3 | Carnivore | 60.56 |
| Alcedo atthis | I | Riverine | 2 | 1 | Carnivore | 61.16 |
| Falco tinnunculus | I | Shrubland | 3 | 3 | Carnivore | 71.19 |
| Falco subbuteo | D | Woodland | 3 | 3 | Carnivore | 66.73 |
| Lanius collurio | D | Woodland | 3 | 3 | Carnivore | 66.4 |
| Pica pica | I | Human Modified | 3 | 1 | Omnivore | 71.19 |
| Corvus monedula | I | Human Modified | 3 | 2 | Omnivore | 67.35 |
| Corvus frugilegus | I | Grassland | 3 | 1 | Omnivore | 66.07 |
| Corvus corone | I | Human Modified | 3 | 1 | Carnivore | 71.19 |
| Poecile palustris | I | Forest | 1 | 1 | Omnivore | 65.42 |
| Poecile montanus | I | Forest | 1 | 1 | Omnivore | 71.19 |
| Cyanistes caeruleus | I | Forest | 1 | 1 | Omnivore | 67.75 |
| Remiz pendulinus | I | Wetland | 2 | 3 | Omnivore | 59.57 |
| Lullula arborea | I | Woodland | 3 | 2 | Omnivore | 62.34 |
| Alauda arvensis | D | Grassland | 3 | 2 | Omnivore | 71.13 |
| Panurus biarmicus | I | Wetland | 3 | 2 | Omnivore | 65.29 |
| Locustella luscinioides | I | Wetland | 3 | 3 | Carnivore | 60.84 |
| Hippolais icterina | D | Woodland | 1 | 3 | Carnivore | 68.41 |
| Acrocephalus schoenobaenus | D | Wetland | 3 | 3 | Carnivore | 71.12 |
| Acrocephalus palustris | I | Shrubland | 3 | 3 | Carnivore | 65.42 |
| Riparia riparia | D | Riverine | 3 | 3 | Carnivore | 72.45 |
| Phylloscopus collybita | I | Forest | 1 | 3 | Carnivore | 70.14 |
| Sylvia atricapilla | I | Woodland | 1 | 3 | Omnivore | 68.26 |
| Curruca communis | I | Shrubland | 3 | 3 | Omnivore | 68.4 |
| Regulus ignicapilla | I | Forest | 1 | 3 | Carnivore | 56.12 |
| Certhia brachydactyla | I | Forest | 1 | 1 | Carnivore | 56.4 |
| Certhia familiaris | I | Forest | 1 | 1 | Omnivore | 70.4 |
| Sitta europaea | I | Forest | 1 | 1 | Carnivore | 67.75 |
| Troglodytes troglodytes | I | Forest | 1 | 3 | Carnivore | 69.33 |
| Sturnus vulgaris | D | Human Modified | 3 | 2 | Omnivore | 71.19 |
| Muscicapa striata | I | Forest | 1 | 3 | Carnivore | 70.56 |
| Erithacus rubecula | I | Forest | 1 | 3 | Carnivore | 70.59 |
| Luscinia svecica | I | Grassland | 2 | 3 | Carnivore | 71.22 |
| Ficedula parva | I | Woodland | 1 | 3 | Carnivore | 66.03 |
| Phoenicurus phoenicurus | I | Woodland | 1 | 3 | Carnivore | 70.78 |
| Phoenicurus ochruros | I | Rock | 3 | 2 | Omnivore | 61.51 |
| Saxicola rubetra | D | Shrubland | 2 | 3 | Carnivore | 70.31 |
| Saxicola rubicola | I | Shrubland | 3 | 2 | Carnivore | 69.66 |
| Oenanthe oenanthe | D | Grassland | 3 | 3 | Carnivore | 81.4 |
| Turdus philomelos | I | Forest | 1 | 3 | Omnivore | 70.57 |
| Turdus merula | I | Forest | 2 | 1 | Omnivore | 71.09 |
| Passer domesticus | D | Human Modified | 3 | 1 | Herbivore | 71.19 |
| Passer montanus | I | Woodland | 2 | 1 | Omnivore | 71.06 |
| Anthus trivialis | I | Woodland | 2 | 3 | Omnivore | 70.54 |
| Anthus pratensis | D | Grassland | 3 | 2 | Carnivore | 71.19 |
| Anthus campestris | D | Grassland | 3 | 3 | Carnivore | 59.8 |
| Motacilla flava | D | Grassland | 3 | 3 | Carnivore | 72.89 |
| Motacilla alba | I | Human Modified | 3 | 3 | Carnivore | 76 |
| Fringilla coelebs | I | Forest | 2 | 2 | Omnivore | 70.52 |
| Coccothraustes coccothraustes | I | Forest | 1 | 2 | Herbivore | 63.38 |
| Pyrrhula pyrrhula | I | Forest | 2 | 1 | Herbivore | 70.4 |
| Chloris chloris | I | Woodland | 2 | 1 | Herbivore | 70.26 |
| Linaria cannabina | D | Shrubland | 2 | 1 | Herbivore | 65.97 |
| Carduelis carduelis | I | Woodland | 2 | 1 | Herbivore | 63.96 |
| Serinus serinus | I | Forest | 2 | 2 | Herbivore | 60.04 |
| Emberiza citrinella | D | Shrubland | 3 | 2 | Herbivore | 70.65 |
| Schoeniclus schoeniclus | D | Wetland | 2 | 2 | Herbivore | 71.63 |

**Supplementary information S5:** Ecological data extracted from the AVONET database.

| Variable | Explanation | Type |
| --- | --- | --- |
| Habitat | The overall main habitat of each species | Categorical with 10 levels (desert, rock, grassland, shrubland, woodland, forest, humanly modified, wetland, riverine, coastal) |
| Vegetation structure | The density of vegetation preferred in the habitat for each species (AVONET: “habitat density”) | Categorical with 3 levels (dense, semi-open, open) |
| Migration | The level of migration for each species | Categorical with 3 levels (sedentary, partially migratory, migratory) |
| Trophic level | The most important trophic level for each species | Categorical with 3 levels (herbivore, carnivore (including both carnivores and insectivores), omnivore) |
| Max latitude | The maximum latitudinal extent of the species range (breeding and resident range) | Continuous in decimal degrees |

**Supplementary information S6:** Eight-point scale of grazing and mowing affinity reflecting plant species’ tolerance or response to natural disturbance caused by grazing animals (including domesticated animals) as defined by Tyler et al. (2021): 1 = does not endure any grazing/mowing (e.g. Campanula latifolia, Goodyera repens, Lathyrus sylvestris), 2 = endures sporadic (but not regular/repeated) grazing/mowing (e.g. Agrimonia eupatoria, Angelica sylvestris, Geranium sanguineum), 3 = endures regular grazing/mowing but prefers unmanaged habitats (e.g. Aegopodium podagraria, Allium oleraceum, Anthriscus sylvestris), 4 = thrives in both grazed/mown and unmanaged habitats (e.g. Achillea ptarmica, Aquilegia vulgaris, Artemisia campestris), 5 = favored by some grazing/mowing, but survives also in unmanaged habitats (e.g. Achillea millefolium, Anthoxanthum odoratum, Capsella bursa-pastoris), 6 = strongly favored by regular grazing/mowing, but endures some years without management (e.g. Ajuga pyramidalis, Alopecurus pratensis, Arnica montana), 7 = strongly favored by grazing/mowing and disappears within a few years if management ceases (e.g. Blysmus compressus, Briza media, Cirsium acaule), 8 = demands repeated/continuous grazing/mowing (e.g. Bellis perennis, Gentianella campestris, Trifolium repens).

**Supplementary information S7: Biolflor habitat types represented in 11 localities historically and current.** The list was reduced to natural habitats and the habitats that are reasonable for Denmark i.e. omitting Alpine calcareous dwarf scrub communities, Alpine calcareous dwarf scrub communities, Alpine Carex curvula communities, Alpine moor-grass communities, Alpine-montane tall herb and small-reed communities, Arctic-alpine false sedge communities, Arctic-alpine wind-exposed heathlands, Commercially used grasslands, Communities of boulders and scree, Communities of clear-felled areas, Communities of heavy metal soils, Eusiberian ruderal mugwort and thistles communities, and couch-grasslands, Pellitory-of-the-wall communities, Snowbed communities, Snow-heather pine-forests, Subalpine-alpine green alder and willow communities.

| Habitat type | Allindelille historical | Allindelille current | Færgelunden historical | Færgelunden current | Gribskov historical | Gribskov current | Høje Møn historical | Høje Møn current | Jonstrup Vang historical | Jonstrup Vang current | Jægerspris Nordskov historical | Jægerspris Nordskov current | Køge Ås historical | Køge Ås current | Pamhule skov historical | Pamhule skov current | Simested historical | Simested current | Sorø Sønderskov historical | Sorø Sønderskov current | Tisvilde historical | Tisvilde current |
| --- | --- | --- | --- | --- | --- | --- | --- | --- | --- | --- | --- | --- | --- | --- | --- | --- | --- | --- | --- | --- | --- | --- |
| Acidic deciduous bush communities | 1 | 1 | 1 | 1 | 1 | 1 | 1 | 1 | 1 | 1 | 1 | 1 | 1 | 1 | 1 | 1 | 1 | 1 | 1 | 1 | 1 | 1 |
| Acidic mat-grass communities | 1 | 1 | 1 | 1 | 1 | 1 | 1 | 1 | 1 | 1 | 1 | 1 | 1 | 1 | 1 | 1 | 1 | 1 | 1 | 1 | 1 | 1 |
| Acidophilous forest grassland ecotones | 1 | 1 | 1 | 1 | 1 | 1 | 1 | 1 | 1 | 1 | 1 | 1 | 1 | 1 | 1 | 1 | 1 | 1 | 1 | 1 | 1 | 1 |
| Alder marsh woodlands | 1 | 1 | 1 | 1 | 1 | 1 | 1 | 1 | 1 | 1 | 1 | 1 | 1 | 1 | 1 | 1 | 1 | 1 | 1 | 1 | 1 | 1 |
| Annual ruderal communities | 1 | 1 | 1 | 1 | 1 | 1 | 1 | 1 | 1 | 1 | 1 | 1 | 1 | 1 | 1 | 1 | 1 | 1 | 1 | 1 | 1 | 1 |
| Birch-oak forests | 1 | 1 | 1 | 1 | 1 | 1 | 1 | 1 | 1 | 1 | 1 | 1 | 1 | 1 | 1 | 1 | 1 | 1 | 1 | 1 | 1 | 1 |
| Blackthorn and buckthorn shrubs | 1 | 1 | 1 | 1 | 1 | 1 | 1 | 1 | 1 | 1 | 1 | 1 | 1 | 1 | 1 | 1 | 1 | 1 | 1 | 1 | 1 | 1 |
| Bladderwort communities |  |  |  |  | 1 | 1 |  |  | 1 |  | 1 | 1 | 1 |  |  | 1 | 1 | 1 | 1 | 1 | 1 | 1 |
| Bog bilberry pine-forests | 1 | 1 | 1 | 1 | 1 | 1 | 1 | 1 | 1 | 1 | 1 | 1 | 1 | 1 | 1 | 1 | 1 | 1 | 1 | 1 | 1 | 1 |
| Boreal-continental coniferous forests with dwarf scrubs | 1 | 1 | 1 | 1 | 1 | 1 | 1 | 1 | 1 | 1 | 1 | 1 | 1 | 1 | 1 | 1 | 1 | 1 | 1 | 1 | 1 | 1 |
| Bur-marigold and orache bank communities | 1 | 1 | 1 | 1 | 1 | 1 | 1 | 1 | 1 | 1 | 1 | 1 | 1 | 1 | 1 | 1 | 1 | 1 | 1 | 1 | 1 | 1 |
| Chickweed and other field weed communities | 1 | 1 | 1 | 1 | 1 | 1 | 1 | 1 | 1 | 1 | 1 | 1 | 1 | 1 | 1 | 1 | 1 | 1 | 1 | 1 | 1 | 1 |
| Communities of annual trampling resistent plants | 1 | 1 | 1 | 1 | 1 | 1 | 1 | 1 | 1 | 1 | 1 | 1 |  | 1 |  | 1 | 1 | 1 | 1 | 1 | 1 | 1 |
| Communities of aquatic plants rooting in the bed | 1 | 1 |  | 1 | 1 | 1 | 1 | 1 | 1 | 1 | 1 | 1 |  | 1 |  | 1 | 1 | 1 | 1 | 1 |  | 1 |
| Communities of coastal dunes | 1 | 1 | 1 | 1 | 1 | 1 | 1 | 1 | 1 | 1 | 1 | 1 |  | 1 |  | 1 | 1 | 1 | 1 | 1 | 1 | 1 |
| Communities of cracks in rocks and walls | 1 | 1 | 1 | 1 | 1 | 1 | 1 | 1 | 1 | 1 | 1 | 1 |  | 1 | 1 | 1 | 1 | 1 | 1 | 1 | 1 | 1 |
| Communities of dwarf rushes | 1 | 1 |  | 1 | 1 | 1 | 1 | 1 | 1 | 1 | 1 | 1 | 1 | 1 |  | 1 | 1 | 1 | 1 | 1 | 1 | 1 |
| Communities of floating aquatic plants | 1 | 1 |  | 1 | 1 | 1 | 1 | 1 | 1 | 1 |  | 1 | 1 | 1 |  | 1 | 1 | 1 | 1 | 1 |  | 1 |
| Communities of flooded and trampled grasslands | 1 | 1 | 1 | 1 | 1 | 1 | 1 | 1 | 1 | 1 | 1 | 1 | 1 | 1 | 1 | 1 | 1 | 1 | 1 | 1 | 1 | 1 |
| Communities of pools and bog-pools | 1 | 1 | 1 | 1 | 1 | 1 | 1 | 1 | 1 | 1 | 1 | 1 | 1 | 1 | 1 | 1 | 1 | 1 | 1 | 1 | 1 | 1 |
| Communities of reeds and tall sedges | 1 | 1 |  | 1 | 1 | 1 | 1 | 1 | 1 | 1 | 1 | 1 | 1 | 1 | 1 | 1 | 1 | 1 | 1 | 1 | 1 | 1 |
| Communities of sea perlwort | 1 |  | 1 | 1 | 1 |  | 1 |  |  |  | 1 | 1 |  |  |  |  | 1 |  | 1 |  | 1 | 1 |
| Communities of springs and wells | 1 | 1 | 1 | 1 | 1 | 1 | 1 | 1 | 1 | 1 | 1 | 1 | 1 | 1 | 1 | 1 | 1 | 1 | 1 | 1 | 1 | 1 |
| Cord-gras communities |  |  | 1 | 1 |  |  |  |  |  |  | 1 | 1 |  | 1 |  |  |  |  |  |  |  |  |
| Eelgras Communities |  |  |  |  |  |  |  | 1 |  |  |  | 1 |  |  |  |  |  |  |  |  |  |  |
| Fescue-brome communities of dry and semi-dry grasslands | 1 | 1 | 1 | 1 | 1 | 1 | 1 | 1 | 1 | 1 | 1 | 1 | 1 | 1 | 1 | 1 | 1 | 1 | 1 | 1 | 1 | 1 |
| Glasswort communities |  |  | 1 | 1 |  | 1 | 1 |  |  |  | 1 | 1 |  |  |  |  |  |  |  |  |  | 1 |
| Haline grasslands | 1 | 1 | 1 | 1 | 1 | 1 | 1 | 1 | 1 | 1 | 1 | 1 | 1 | 1 |  | 1 | 1 | 1 | 1 | 1 | 1 | 1 |
| Heather and gorse heathlands | 1 | 1 | 1 | 1 | 1 | 1 | 1 | 1 | 1 | 1 | 1 | 1 | 1 | 1 |  | 1 | 1 | 1 | 1 | 1 | 1 | 1 |
| Mesophilous, summer-green deciduous forests | 1 | 1 | 1 | 1 | 1 | 1 | 1 | 1 | 1 | 1 | 1 | 1 | 1 | 1 | 1 | 1 | 1 | 1 | 1 | 1 | 1 | 1 |
| Mudwort communities | 1 | 1 | 1 | 1 | 1 | 1 | 1 | 1 | 1 | 1 | 1 | 1 | 1 | 1 | 1 | 1 | 1 | 1 | 1 | 1 | 1 | 1 |
| Nitrophilous tall herb communities | 1 | 1 | 1 | 1 | 1 | 1 | 1 | 1 | 1 | 1 | 1 | 1 | 1 | 1 | 1 | 1 | 1 | 1 | 1 | 1 | 1 | 1 |
| Pine steppe-forests | 1 | 1 | 1 | 1 | 1 | 1 | 1 | 1 | 1 | 1 | 1 | 1 | 1 | 1 | 1 | 1 | 1 | 1 | 1 | 1 | 1 | 1 |
| Pioneer communities of hair-grasses | 1 | 1 | 1 | 1 | 1 | 1 | 1 | 1 | 1 | 1 | 1 | 1 | 1 | 1 | 1 | 1 | 1 | 1 | 1 | 1 | 1 | 1 |
| Sea rocket and seaweed strandline and shingle communities | 1 | 1 |  | 1 | 1 | 1 | 1 | 1 | 1 |  | 1 | 1 |  | 1 |  | 1 |  | 1 | 1 | 1 | 1 | 1 |
| Tasselweed communities |  |  |  |  |  | 1 |  |  |  | 1 | 1 | 1 |  |  |  |  |  |  |  | 1 |  |  |
| Thermophilous and mesophilous forest grassland ecotones | 1 | 1 | 1 | 1 | 1 | 1 | 1 | 1 | 1 | 1 | 1 | 1 | 1 | 1 | 1 | 1 | 1 | 1 | 1 | 1 | 1 | 1 |
| Thermophilous dry oak forests | 1 | 1 | 1 | 1 | 1 | 1 | 1 | 1 | 1 | 1 | 1 | 1 | 1 | 1 | 1 | 1 | 1 | 1 | 1 | 1 | 1 | 1 |
| Vaccinium Oxycoccus - Sphagnum mires | 1 |  | 1 | 1 | 1 | 1 | 1 | 1 | 1 | 1 | 1 | 1 | 1 | 1 |  | 1 | 1 | 1 | 1 | 1 | 1 | 1 |
| Willow communities of river banks and floodplains | 1 | 1 | 1 | 1 | 1 | 1 | 1 | 1 | 1 | 1 | 1 | 1 | 1 | 1 | 1 | 1 | 1 | 1 | 1 | 1 | 1 | 1 |
| Willow marsh shrublands | 1 | 1 | 1 | 1 | 1 | 1 | 1 | 1 | 1 | 1 | 1 | 1 | 1 | 1 | 1 | 1 | 1 | 1 | 1 | 1 | 1 | 1 |

**Supplementary information S8:** Land-use classes from 1881 (Danmarks Statistik: Statistisk Tabelværks 4de række, Litra C, Nr. 4) were aggregated to fewer and broader categories using this table.

| **Land-use classes 1881** | **Land-use class** |
| --- | --- |
| Total sown area | Rotational field |
| Fields for grazing | Fallow field |
| Field for haymaking | Fallow field |
| Field for breeding clover and grass seeds | Fallow field |
| Field pure fallow | Rotational field |
| Field half fallow | Fallow field |
| Meadow | Meadow |
| Commons & grassland for grazing | Grassland |
| Garden | Built-up |
| Forest and plantation | Forest plantation |
| Mire & fen | Mire |
| Heath | Heath |
| Shifting sands | Dunes |
| Fields with no cultivation | Grassland |
| Building plots and courtyards | Built-up |
| Hedgerow, roads, trails and water area | Technical infrastructure |

**Supplementary information S9:** Basemap 04 categories (Levin 2022) were aggregated to fewer and broader categories using this table. Basemap 04 object code, object name and aggregated names as well as land-use classes used in this study are shown.

| **Basemap object Code** | **Basemap Object Name** | **Basemap aggregated name** | **Land-use class** |
| --- | --- | --- | --- |
| 50996320 | Road centreline, Local road - tertiary, Not paved | 142000 Road, not paved | Technical infrastructure |
| 50994202 | Lake, Lake | 411000 Lake | Water bodies |
| 30000600 | Lake | 411000 Lake | Water bodies |
| 50994601 | Building, Building | 110000 Building | Built-up |
| 50996323 | Road centreline, Other road, Not paved | 142000 Road, not paved | Technical infrastructure |
| 30000300 | Mire / bog | 322000 Nature, wet | Mire |
| 50996325 | Road centreline, Driveway, Not paved | 142000 Road, not paved | Technical infrastructure |
| 50996501 | Stream centreline, 2.5 - 12 m width | 412000 Stream | Water bodies |
| 50600000 | Land | 211000 Agriculture, intensive, temporary crops | Rotational field |
| 50991700 | Forest | 311000 Forest | Forest plantation |
| 30000400 | Dry meadow | 321000 Nature, dry | Grassland |
| 50995400 | Low built up | 121000 Low built up | Built-up |
| 50996316 | Road centreline, Local road - secondary, Paved | 141000 Road, paved | Technical infrastructure |
| 20320400 | Plain | 321000 Nature, dry | Grassland |
| 20610700 | Beech | 311000 Forest | Forest plantation |
| 20621400 | Larch | 311000 Forest | Forest plantation |
| 20310300 | Mire / bog | 322000 Nature, wet | Mire |
| 20110200 | Lake | 411000 Lake | Water bodies |
| 50600000 | Land | 211000 Agriculture, intensive, temporary crops | Rotational field |
| 50600000 | Land | 211000 Agriculture, intensive, temporary crops | Rotational field |
| 50600000 | Land | 211000 Agriculture, intensive, temporary crops | Rotational field |
| 50600000 | Land | 211000 Agriculture, intensive, temporary crops | Rotational field |
| 50600000 | Land | 211000 Agriculture, intensive, temporary crops | Rotational field |
| 20621900 | Common spruce | 311000 Forest | Forest plantation |
| 20620800 | Douglas fir | 311000 Forest | Forest plantation |
| 50600000 | Land | 211000 Agriculture, intensive, temporary crops | Rotational field |
| 50600000 | Land | 211000 Agriculture, intensive, temporary crops | Rotational field |
| 40999900 | Alluvial forests with Alnus glutinosa and Fraxinus excelsior (Alno-Padion, Alnion incanae, Salicion albae) | 312000 Forest, wet | Forest wet |
| 20610300 | Ash | 311000 Forest | Forest plantation |
| 40913000 | Asperulo-Fagetum beech forests | 311000 Forest | Forest plantation |
| 20611300 | Great maple | 311000 Forest | Forest plantation |
| 40621000 | Semi-natural dry grasslands and scrubland facies on calcareous substrates (Festuco-Brometalia) | 321000 Nature, dry | Grassland |
| 50600000 | Land | 211000 Agriculture, intensive, temporary crops | Rotational field |
| 40915000 | Medio-European limestone beech forests of the Cephalanthero-Fagion | 311000 Forest | Forest plantation |
| 50600000 | Land | 211000 Agriculture, intensive, temporary crops | Rotational field |
| 50992100 | Sand / dune | 321000 Nature, dry | Dune |
| 50996318 | Road centreline, Local road - tertiary, Paved | 141000 Road, paved | Technical infrastructure |
| 10310300 | Mire / bog | 322000 Nature, wet | Mire |
| 50996324 | Road centreline, Driveway, Paved | 141000 Road, paved | Technical infrastructure |
| 10320100 | Heather | 321000 Nature, dry | Heath |
| 50991900 | Wetland | 322000 Nature, wet | Water bodies |
| 10320400 | Plain | 321000 Nature, dry | Grassland |
| 10320800 | Beach | 321000 Nature, dry | Dune |
| 50995701 | Edge of stream, >= 12 m width | 412000 Stream | Water bodies |
| 10612800 | Scrub | 311000 Forest | Forest plantation |
| 50996321 | Road centreline, Other road, paved | 141000 Road, paved | Technical infrastructure |
| 50990118 | Technical area, Unknown | 124000 Other built up | Technical infrastructure |
| 50990206 | Basin, Unknown | 124000 Other built up | Built-up |
| 80000100 | Cadastre, road | 141000 Road, paved | Technical infrastructure |
| 50995400 | Low built up | 121110 Low built up; Building | Built-up |
| 50990118 | Technical area, Unknown | 124110 Other built up; Building | Technical infrastructure |
| 50995300 | Buisness | 125000 Industry / business | Technical infrastructure |
| 50995300 | Buisness | 125110 Industry / business; Building | Technical infrastructure |
| 30000100 | Wet meadow | 322000 Nature, wet | Meadow |
| 10320500 | Dry meadow | 321000 Nature, dry | Grassland |
| 50997800 | Burial ground | 130000 Recreation area / sports ground | Built-up |
| 50997800 | Burial ground | 130110 Recreation area / sports ground; Building | Built-up |
| 50994400 | Harbour | 124000 Other built up | Technical infrastructure |
| 50600000 | Land | 211000 Agriculture, intensive, temporary crops | Rotational field |
| 30000500 | Coastal meadow | 322000 Nature, wet | Meadow |
| 30000100 | Wet meadow | 322220 Nature, wet, Agriculture, extensive | Meadow |
| 50600000 | Land | 211000 Agriculture, intensive, temporary crops | Rotational field |
| 50600000 | Land | 211000 Agriculture, intensive, temporary crops | Rotational field |
| 50600000 | Land | 211000 Agriculture, intensive, temporary crops | Rotational field |
| 30000100 | Wet meadow | 322220 Nature, wet, Agriculture, extensive | Meadow |
| 50600000 | Land | 211000 Agriculture, intensive, temporary crops | Rotational field |
| 50600000 | Land | 211000 Agriculture, intensive, temporary crops | Rotational field |
| 50600000 | Land | 211000 Agriculture, intensive, temporary crops | Rotational field |
| 50600000 | Land | 211000 Agriculture, intensive, temporary crops | Rotational field |
| 30000400 | Dry meadow | 321220 Nature, dry, Agriculture, extensive | Grassland |
| 50996314 | Road centreline, Traffic road -distribution, Paved | 141000 Road, paved | Technical infrastructure |
| 50600000 | Land | 211000 Agriculture, intensive, temporary crops | Rotational field |
| 50600000 | Land | 211000 Agriculture, intensive, temporary crops | Rotational field |
| 50600000 | Land | 211000 Agriculture, intensive, temporary crops | Rotational field |
| 40999800 | Bog woodland | 312000 Forest, wet | Forest wet |
| 40641000 | Molinia meadows on calcareous, peaty or clayey-silt laden soils (Molinion caeruleae) | 322000 Nature, wet | Meadow |
| 40641000 | Molinia meadows on calcareous, peaty or clayey-silt laden soils (Molinion caeruleae) | 322220 Nature, wet, Agriculture, extensive | Meadow |
| 40623000 | Species-rich Nardus grasslands, on siliceous substrates in mountain areas (and submountain areas, in Continental Europe) | 321220 Nature, dry, Agriculture, extensive | Grassland |
| 40641000 | Molinia meadows on calcareous, peaty or clayey-silt laden soils (Molinion caeruleae) | 322220 Nature, wet, Agriculture, extensive | Meadow |
| 40133000 | Atlantic salt meadows | 322220 Nature, wet, Agriculture, extensive | Meadow |
| 40133000 | Atlantic salt meadows | 322220 Nature, wet, Agriculture, extensive | Meadow |
| 40133000 | Atlantic salt meadows | 322000 Nature, wet | Meadow |
| 40714000 | Transition mires and quaking bogs | 322000 Nature, wet | Mire |
| 30000500 | Coastal meadow | 322220 Nature, wet, Agriculture, extensive | Meadow |
| 40623000 | Species-rich Nardus grasslands, on siliceous substrates in mountain areas (and submountain areas, in Continental Europe) | 321000 Nature, dry | Grassland |
| 40623000 | Species-rich Nardus grasslands, on siliceous substrates in mountain areas (and submountain areas, in Continental Europe) | 321220 Nature, dry, Agriculture, extensive | Grassland |
| 50991900 | Wetland | 322220 Nature, wet, Agriculture, extensive | Water bodies |
| 10110200 | Lake | 411000 Lake | Water bodies |
| 30000500 | Coastal meadow | 322220 Nature, wet, Agriculture, extensive | Meadow |
| 40122000 | Perennial vegetation of stony banks | 321000 Nature, dry | Grassland |
| 80000300 | Cadastre, beach protection | 321000 Nature, dry | Technical infrastructure |
| 40911000 | Luzulo-Fagetum beech forests | 311000 Forest | Forest plantation |
| 10621900 | Common spruce | 311000 Forest | Forest plantation |
| 10610600 | Birch | 311000 Forest | Forest plantation |
| 10310100 | Wet meadow | 322000 Nature, wet | Meadow |
| 10622000 | Sita spruce | 311000 Forest | Forest plantation |
| 10610300 | Ash | 311000 Forest | Forest plantation |
| 40916000 | Sub-Atlantic and medio-European oak or oakhornbeam forests of the Carpinion betuli | 311000 Forest | Forest plantation |
| 50600000 | Land | 211000 Agriculture, intensive, temporary crops | Rotational field |
| 10700100 | Field | 211000 Agriculture, intensive, temporary crops | Rotational field |
| 10310400 | Coastal meadow | 322000 Nature, wet | Meadow |
| 10201400 | Shooting range | 124000 Other built up | Built-up |
| 10621800 | Austran pine | 311000 Forest | Forest plantation |
| 10710200 | Gaming area | 211000 Agriculture, intensive, temporary crops | Rotational field |
| 10200900 | Practice ground (bare) | 124000 Other built up | Built-up |
| 10610900 | Contorta | 311000 Forest | Forest plantation |
| 50600000 | Land | 211000 Agriculture, intensive, temporary crops | Rotational field |
| 30000300 | Mire / bog | 322220 Nature, wet, Agriculture, extensive | Mire |
| 50996313 | Road centreline, Traffic road - thoroughfare, Paved, All traffic | 141000 Road, paved | Technical infrastructure |
| 50996315 | Road centreline, Local road - primary, Paved | 141000 Road, paved | Technical infrastructure |
| 50311900 | Recreation area | 130000 Recreation area / sports ground | Built-up |
| 50311900 | Recreation area | 130110 Recreation area / sports ground; Building | Built-up |
| 30000100 | Wet meadow | 322220 Nature, wet, Agriculture, extensive | Meadow |
| 50600000 | Land | 211000 Agriculture, intensive, temporary crops | Rotational field |
| 50600000 | Land | 211000 Agriculture, intensive, temporary crops | Rotational field |
| 50990110 | Technical area, Sports ground | 130000 Recreation area / sports ground | Built-up |
| 50995500 | High built up | 122000 High built up | Built-up |
| 50990110 | Technical area, Sports ground | 130110 Recreation area / sports ground; Building | Built-up |
| 50996401 | Railway, Visible | 150000 Railway | Technical infrastructure |
| 50996401 | Railway, Visible | 150110 Railway; Building | Technical infrastructure |
| 20612800 | Scrub | 311000 Forest | Forest plantation |
| 20622100 | Scotsh pine | 311000 Forest | Forest plantation |
| 20610600 | Birch | 311000 Forest | Forest plantation |
| 20622000 | Sita spruce | 311000 Forest | Forest plantation |
| 80000200 | Cadastre, rail | 150000 Railway | Technical infrastructure |
| 20610900 | Contorta | 311000 Forest | Forest plantation |
| 20201100 | Public area | 130000 Recreation area / sports ground | Built-up |
| 20611000 | Oak | 311000 Forest | Forest plantation |
| 20600200 | Uncultivated area | 321000 Nature, dry | Grassland |
| 20320400 | Plain | 321220 Nature, dry, Agriculture, extensive | Grassland |
| 20621000 | Frensh mountain pine | 311000 Forest | Forest plantation |
| 20201100 | Public area | 130110 Recreation area / sports ground; Building | Built-up |
| 20621700 | Omorika | 311000 Forest | Forest plantation |
| 20621600 | Nobilis | 311000 Forest | Forest plantation |
| 20621100 | Common silver fir | 311000 Forest | Forest plantation |
| 20611100 | Alder | 311000 Forest | Forest plantation |
| 30000100 | Wet meadow | 322220 Nature, wet, Agriculture, extensive | Meadow |
| 50600000 | Land | 211000 Agriculture, intensive, temporary crops | Rotational field |
| 50600000 | Land | 211000 Agriculture, intensive, temporary crops | Rotational field |
| 20320400 | Plain | 321220 Nature, dry, Agriculture, extensive | Grassland |
| 20320400 | Plain | 321220 Nature, dry, Agriculture, extensive | Grassland |
| 50600000 | Land | 211000 Agriculture, intensive, temporary crops | Rotational field |
| 50600000 | Land | 211000 Agriculture, intensive, temporary crops | Rotational field |
| 50600000 | Land | 211000 Agriculture, intensive, temporary crops | Rotational field |
| 20320400 | Plain | 321220 Nature, dry, Agriculture, extensive | Grassland |
| 20310100 | Wet meadow | 322220 Nature, wet, Agriculture, extensive | Meadow |
| 50600000 | Land | 211000 Agriculture, intensive, temporary crops | Rotational field |
| 20320400 | Plain | 321220 Nature, dry, Agriculture, extensive | Grassland |
| 20310100 | Wet meadow | 322220 Nature, wet, Agriculture, extensive | Meadow |
| 20310100 | Wet meadow | 322220 Nature, wet, Agriculture, extensive | Meadow |
| 20310100 | Wet meadow | 322000 Nature, wet | Meadow |
| 20310300 | Mire / bog | 322220 Nature, wet, Agriculture, extensive | Mire |
| 20612500 | Common alder | 311000 Forest | Forest plantation |
| 50996317 | Road centreline, Local road - secondary, Unpaved | 142000 Road, not paved | Technical infrastructure |
| 20310100 | Wet meadow | 322220 Nature, wet, Agriculture, extensive | Meadow |
| 50600000 | Land | 211000 Agriculture, intensive, temporary crops | Rotational field |
| 50600000 | Land | 211000 Agriculture, intensive, temporary crops | Rotational field |
| 50600000 | Land | 211000 Agriculture, intensive, temporary crops | Rotational field |
| 50600000 | Land | 211000 Agriculture, intensive, temporary crops | Rotational field |
| 20621500 | Norman spruce | 311000 Forest | Forest plantation |
| 20320500 | Dry meadow | 321000 Nature, dry | Grassland |
| 20320500 | Dry meadow | 321220 Nature, dry, Agriculture, extensive | Grassland |
| 20610200 | Not specified deciduous tree | 311000 Forest | Forest plantation |
| 30000400 | Dry meadow | 321220 Nature, dry, Agriculture, extensive | Grassland |
| 30000400 | Dry meadow | 321220 Nature, dry, Agriculture, extensive | Grassland |
| 30000300 | Mire / bog | 322220 Nature, wet, Agriculture, extensive | Mire |
| 40723000 | Alkaline fens | 322220 Nature, wet, Agriculture, extensive | Mire |
| 40723000 | Alkaline fens | 322000 Nature, wet | Mire |
| 20620200 | Grandis | 311000 Forest | Forest plantation |
| 50600000 | Land | 211000 Agriculture, intensive, temporary crops | Rotational field |
| 20612000 | Lime | 311000 Forest | Forest plantation |
| 50600000 | Land | 211000 Agriculture, intensive, temporary crops | Rotational field |
| 50600000 | Land | 212000 Agriculture, intensive, permanent crops | Rotational field |
| 20620900 | European larch | 311000 Forest | Forest plantation |
| 50600000 | Land | 212000 Agriculture, intensive, permanent crops | Rotational field |
| 40403000 | European dry heaths | 321220 Nature, dry, Agriculture, extensive | Heath |
| 20320500 | Dry meadow | 321220 Nature, dry, Agriculture, extensive | Grassland |
| 50600000 | Land | 212000 Agriculture, intensive, permanent crops | Rotational field |
| 50991900 | Wetland | 322220 Nature, wet, Agriculture, extensive | Water bodies |
| 20320500 | Dry meadow | 321220 Nature, dry, Agriculture, extensive | Grassland |
| 20622300 | Hemlock | 311000 Forest | Forest plantation |
| 20620700 | Cypress | 311000 Forest | Forest plantation |
| 50600000 | Land | 212000 Agriculture, intensive, permanent crops | Rotational field |
| 20310300 | Mire / bog | 322220 Nature, wet, Agriculture, extensive | Mire |
| 50600000 | Land | 220000 Agriculture, extensive | Fallow field |
| 40722000 | Petrifying springs with tufa formation (Cratoneurion) | 322000 Nature, wet | Mire |
| 40722000 | Petrifying springs with tufa formation (Cratoneurion) | 322220 Nature, wet, Agriculture, extensive | Mire |
| 20611700 | Cherry | 311000 Forest | Forest plantation |
| 20622200 | Thuja | 311000 Forest | Forest plantation |
| 50600000 | Land | 220000 Agriculture, extensive | Fallow field |
| 20310300 | Mire / bog | 322220 Nature, wet, Agriculture, extensive | Mire |
| 20201300 | Ressource extraction | 160000 Resource extraction | Technical infrastructure |
| 50991900 | Wetland | 322220 Nature, wet, Agriculture, extensive | Water bodies |
| 20612400 | Red oak | 311000 Forest | Forest plantation |
| 50996312 | Road centreline, Traffic road - thoroughfare, Paved, Secondary highway | 141000 Road, paved | Technical infrastructure |
| 20201200 | Ruin / barrow | 130000 Recreation area / sports ground | Built-up |
| 40714000 | Transition mires and quaking bogs | 322220 Nature, wet, Agriculture, extensive | Mire |
| 20611600 | Horse Chetnut | 311000 Forest | Forest plantation |
| 20320800 | Beach | 321000 Nature, dry | Dune |
| 30000400 | Dry meadow | 321220 Nature, dry, Agriculture, extensive | Grassland |
| 20600300 | Hillside | 321000 Nature, dry | Grassland |
| 20320400 | Plain | 321220 Nature, dry, Agriculture, extensive | Grassland |
| 50600000 | Land | 220000 Agriculture, extensive | Fallow field |
| 50600000 | Land | 220000 Agriculture, extensive | Fallow field |
| 50990116 | Technical area, Car park | 124000 Other built up | Built-up |
| 50600000 | Land | 220000 Agriculture, extensive | Fallow field |
| 40621000 | Semi-natural dry grasslands and scrubland facies on calcareous substrates (Festuco-Brometalia) | 321220 Nature, dry, Agriculture, extensive | Grassland |
| 40621000 | Semi-natural dry grasslands and scrubland facies on calcareous substrates (Festuco-Brometalia) | 321220 Nature, dry, Agriculture, extensive | Grassland |
| 40621000 | Semi-natural dry grasslands and scrubland facies on calcareous substrates (Festuco-Brometalia) | 321220 Nature, dry, Agriculture, extensive | Grassland |
| 20201000 | Park / recreation ground | 130000 Recreation area / sports ground | Built-up |
| 50600000 | Land | 220000 Agriculture, extensive | Fallow field |
| 50990115 | Technical area, Military site | 124000 Other built up | Grassland |
| 20201500 | Wood storage | 311000 Forest | Forest plantation |
| 50991900 | Wetland | 322220 Nature, wet, Agriculture, extensive | Water bodies |
| 30000100 | Wet meadow | 322220 Nature, wet, Agriculture, extensive | Meadow |
| 30000300 | Mire / bog | 322220 Nature, wet, Agriculture, extensive | Mire |
| 30000300 | Mire / bog | 322220 Nature, wet, Agriculture, extensive | Mire |
| 30000100 | Wet meadow | 322220 Nature, wet, Agriculture, extensive | Meadow |
| 50600000 | Land | 220000 Agriculture, extensive | Fallow field |
| 50600000 | Land | 220000 Agriculture, extensive | Fallow field |
| 30000300 | Mire / bog | 322220 Nature, wet, Agriculture, extensive | Mire |
| 50996311 | Road centreline, Traffic road - thoroughfare, Paved, Highway | 141000 Road, paved | Technical infrastructure |
| 50600000 | Land | 220000 Agriculture, extensive | Fallow field |
| 50991900 | Wetland | 322220 Nature, wet, Agriculture, extensive | Water bodies |
| 30000300 | Mire / bog | 322220 Nature, wet, Agriculture, extensive | Mire |
| 30000100 | Wet meadow | 322220 Nature, wet, Agriculture, extensive | Meadow |
| 50600000 | Land | 220000 Agriculture, extensive | Fallow field |
| 30000300 | Mire / bog | 322220 Nature, wet, Agriculture, extensive | Mire |
| 30000100 | Wet meadow | 322220 Nature, wet, Agriculture, extensive | Meadow |
| 50991900 | Wetland | 322220 Nature, wet, Agriculture, extensive | Water bodies |
| 50991900 | Wetland | 322220 Nature, wet, Agriculture, extensive | Water bodies |
| 30000100 | Wet meadow | 322220 Nature, wet, Agriculture, extensive | Meadow |
| 30000100 | Wet meadow | 322220 Nature, wet, Agriculture, extensive | Meadow |
| 50600000 | Land | 220000 Agriculture, extensive | Fallow field |
| 30000300 | Mire / bog | 322220 Nature, wet, Agriculture, extensive | Mire |
| 30000100 | Wet meadow | 322220 Nature, wet, Agriculture, extensive | Meadow |
| 30000300 | Mire / bog | 322220 Nature, wet, Agriculture, extensive | Mire |
| 50996502 | Stream centreline, <= 12 m width | 412000 Stream | Water bodies |
| 30000100 | Wet meadow | 322220 Nature, wet, Agriculture, extensive | Meadow |
| 30000300 | Mire / bog | 322220 Nature, wet, Agriculture, extensive | Mire |
| 50991900 | Wetland | 322220 Nature, wet, Agriculture, extensive | Water bodies |
| 20310300 | Mire / bog | 322220 Nature, wet, Agriculture, extensive | Mire |
| 20310100 | Wet meadow | 322220 Nature, wet, Agriculture, extensive | Meadow |
| 20611400 | Hazel | 311000 Forest | Forest plantation |
| 20610500 | Hornbeam | 311000 Forest | Forest plantation |
| 20310100 | Wet meadow | 322220 Nature, wet, Agriculture, extensive | Meadow |
| 50991800 | Heather | 321000 Nature, dry | Heath |
| 30000300 | Mire / bog | 322220 Nature, wet, Agriculture, extensive | Mire |
| 30000100 | Wet meadow | 322220 Nature, wet, Agriculture, extensive | Meadow |
| 50600000 | Land | 220000 Agriculture, extensive | Fallow field |
| 30000400 | Dry meadow | 321220 Nature, dry, Agriculture, extensive | Grassland |
| 50600000 | Land | 220000 Agriculture, extensive | Fallow field |
| 50600000 | Land | 220000 Agriculture, extensive | Fallow field |
| 50600000 | Land | 220000 Agriculture, extensive | Fallow field |
| 30000400 | Dry meadow | 321220 Nature, dry, Agriculture, extensive | Grassland |
| 30000100 | Wet meadow | 322220 Nature, wet, Agriculture, extensive | Meadow |
| 50600000 | Land | 220000 Agriculture, extensive | Fallow field |
| 50600000 | Land | 220000 Agriculture, extensive | Fallow field |
| 30000100 | Wet meadow | 322220 Nature, wet, Agriculture, extensive | Meadow |
| 50600000 | Land | 220000 Agriculture, extensive | Fallow field |
| 30000300 | Mire / bog | 322220 Nature, wet, Agriculture, extensive | Mire |
| 50600000 | Land | 220000 Agriculture, extensive | Fallow field |
| 50600000 | Land | 230000 Agriculture, not classified | Fallow field |
| 50600000 | Land | 311000 Forest | Forest plantation |
| 50991900 | Wetland | 322220 Nature, wet, Agriculture, extensive | Water bodies |
| 50600000 | Land | 311000 Forest | Forest plantation |
| 50990106 | Technical area, Train station/rail area | 150000 Railway | Technical infrastructure |
| 50600000 | Land | 311000 Forest | Forest plantation |
| 50600000 | Land | 311000 Forest | Forest plantation |
| 40123000 | Vegetated sea cliffs of the Atlantic and Baltic coasts | 321000 Nature, dry | NA |
| 50700000 | Sea | 420000 Sea | NA |
| 50995500 | High built up | 122110 High built up; Building | Built-up |
| 20320100 | Heather | 321000 Nature, dry | Heath |
| 20310300 | Mire / bog | 322220 Nature, wet, Agriculture, extensive | Mire |
| 20310400 | Coastal meadow | 322000 Nature, wet | Meadow |
| 40712000 | Degraded raised bogs still capable of natural regeneration | 322000 Nature, wet | Mire |
| 20310300 | Mire / bog | 322220 Nature, wet, Agriculture, extensive | Mire |
| 20320400 | Plain | 321220 Nature, dry, Agriculture, extensive | Grassland |
| 20200600 | Golf course | 130000 Recreation area / sports ground | Built-up |
| 20310100 | Wet meadow | 322220 Nature, wet, Agriculture, extensive | Meadow |
| 40219000 | Humid dune slacks | 321000 Nature, dry | Dune |
| 40213000 | Fixed coastal dunes with herbaceous vegetation (grey dunes) | 321000 Nature, dry | Dune |
| 40214000 | Decalcified fixed dunes with Empetrum nigrum | 321000 Nature, dry | Dune |
| 30000200 | Heather | 321000 Nature, dry | Heath |
| 40218000 | Wooded dunes of the Atlantic, Continental and Boreal region | 311000 Forest | Forest plantation |
| 40214000 | Decalcified fixed dunes with Empetrum nigrum | 321220 Nature, dry, Agriculture, extensive | Dune |
| 30000200 | Heather | 321220 Nature, dry, Agriculture, extensive | Heath |
| 20620500 | Mountain pine | 311000 Forest | Forest plantation |
| 20621800 | Austran pine | 311000 Forest | Forest plantation |
| 20622400 | White spruce | 311000 Forest | Forest plantation |
| 20320100 | Heather | 321220 Nature, dry, Agriculture, extensive | Heath |
| 20320600 | Dune | 321000 Nature, dry | Dune |
| 40213000 | Fixed coastal dunes with herbaceous vegetation (grey dunes) | 321220 Nature, dry, Agriculture, extensive | Dune |
| 30000300 | Mire / bog | 322220 Nature, wet, Agriculture, extensive | Mire |
| 30000200 | Heather | 321220 Nature, dry, Agriculture, extensive | Heath |
| 20320400 | Plain | 321220 Nature, dry, Agriculture, extensive | Grassland |
| 30000300 | Mire / bog | 322220 Nature, wet, Agriculture, extensive | Mire |
| 30000300 | Mire / bog | 322220 Nature, wet, Agriculture, extensive | Mire |
| 20610400 | Aspen | 311000 Forest | Forest plantation |
| 40641000 | Molinia meadows on calcareous, peaty or clayey-silt laden soils (Molinion caeruleae) | 322220 Nature, wet, Agriculture, extensive | Meadow |
| 40213000 | Fixed coastal dunes with herbaceous vegetation (grey dunes) | 321220 Nature, dry, Agriculture, extensive | Dune |
| 50991900 | Wetland | 322220 Nature, wet, Agriculture, extensive | Water bodies |
| 50600000 | Land | 800000 Unmapped | NA |
| 50991900 | Wetland | 322220 Nature, wet, Agriculture, extensive | Water bodies |
| 20310300 | Mire / bog | 322220 Nature, wet, Agriculture, extensive | Mire |
| 50990116 | Technical area, Car park | 124110 Other built up; Building | Built-up |

**Supplementary information S10: Redlisted vascular plant species in 11 localities – historical and current.**

Plant species and red list category for Denmark (DK, IUCN) are given as well as the number of localities the species have disappeared from (‘disappeared’, occurring historically but missing in current dataset) and appeared on (‘appeared’, missing historically but occurring in current dataset) during the study period.

| Species, red list category | Allindelille, historical | Allindelille, current | Færgelunden, historical | Færgelunden, current | Gribskov, historical | Gribskov, current | Høje Møn, historical | Høje Møn, current | Jonstrup Vang, historical | Jonstrup Vang, current | Jægerspris Nordskov, historical | Jægerspris Nordskov, current | Køge Ås, historical | Køge Ås, current | Pamhule skov, historical | Pamhule skov, current | Simested, historical | Simested, current | Sorø Sønderskov, historical | Sorø Sønderskov, current | Tisvilde, historical | Tisvilde, current | disappeared | appeared |
| --- | --- | --- | --- | --- | --- | --- | --- | --- | --- | --- | --- | --- | --- | --- | --- | --- | --- | --- | --- | --- | --- | --- | --- | --- |
| Ajuga pyramidalis, EN | 0 | 0 | 0 | 0 | 0 | 0 | 0 | 0 | 1 | 0 | 0 | 0 | 0 | 0 | 0 | 0 | 0 | 0 | 0 | 0 | 0 | 0 | 1 | 0 |
| Alchemilla filicaulis, NT | 0 | 0 | 0 | 0 | 0 | 0 | 0 | 0 | 0 | 0 | 0 | 0 | 0 | 0 | 0 | 1 | 0 | 0 | 0 | 1 | 0 | 0 | 0 | 2 |
| Alchemilla glaucescens, NT | 0 | 0 | 0 | 0 | 0 | 0 | 0 | 1 | 0 | 0 | 0 | 0 | 0 | 0 | 0 | 0 | 0 | 0 | 0 | 0 | 0 | 0 | 0 | 1 |
| Alchemilla subcrenata, EN | 0 | 0 | 0 | 0 | 0 | 0 | 0 | 0 | 0 | 0 | 0 | 0 | 0 | 0 | 0 | 0 | 0 | 0 | 0 | 1 | 0 | 0 | 0 | 1 |
| Allium vineale, DD | 0 | 0 | 0 | 0 | 0 | 0 | 1 | 1 | 0 | 0 | 1 | 1 | 1 | 0 | 0 | 0 | 0 | 0 | 0 | 0 | 0 | 1 | 1 | 1 |
| Anacamptis morio, NT | 0 | 0 | 0 | 0 | 0 | 0 | 1 | 0 | 1 | 0 | 1 | 1 | 0 | 0 | 0 | 0 | 0 | 0 | 0 | 0 | 0 | 0 | 2 | 0 |
| Anacamptis pyramidalis, VU | 1 | 0 | 0 | 0 | 0 | 0 | 1 | 1 | 0 | 0 | 0 | 0 | 0 | 0 | 0 | 0 | 0 | 0 | 0 | 0 | 0 | 0 | 1 | 0 |
| Antennaria dioica, NT | 0 | 0 | 0 | 0 | 0 | 0 | 1 | 0 | 0 | 0 | 1 | 1 | 0 | 0 | 0 | 0 | 1 | 0 | 0 | 0 | 0 | 1 | 2 | 1 |
| Anthericum liliago, EN | 0 | 0 | 1 | 0 | 0 | 0 | 0 | 0 | 0 | 0 | 0 | 0 | 0 | 0 | 0 | 0 | 0 | 0 | 0 | 0 | 0 | 1 | 1 | 1 |
| Anthericum ramosum, NT | 0 | 0 | 1 | 0 | 0 | 0 | 0 | 0 | 1 | 0 | 0 | 0 | 0 | 0 | 0 | 0 | 0 | 0 | 0 | 0 | 0 | 1 | 2 | 1 |
| Apium repens, RE | 0 | 0 | 0 | 0 | 0 | 0 | 0 | 0 | 0 | 0 | 0 | 0 | 0 | 0 | 0 | 0 | 1 | 0 | 0 | 0 | 0 | 0 | 1 | 0 |
| Arnica montana, NT | 0 | 0 | 0 | 0 | 0 | 0 | 0 | 0 | 1 | 0 | 0 | 0 | 0 | 0 | 0 | 0 | 1 | 1 | 1 | 0 | 0 | 0 | 2 | 0 |
| Asplenium septentrionale, CR | 0 | 0 | 0 | 0 | 1 | 0 | 0 | 0 | 1 | 0 | 0 | 0 | 0 | 0 | 0 | 0 | 0 | 0 | 0 | 0 | 0 | 0 | 2 | 0 |
| Asplenium trichomanes, EN | 1 | 0 | 0 | 0 | 1 | 0 | 0 | 0 | 0 | 0 | 0 | 0 | 0 | 0 | 0 | 0 | 0 | 0 | 0 | 0 | 0 | 0 | 2 | 0 |
| Atriplex pedunculata, NT | 0 | 0 | 0 | 0 | 0 | 0 | 0 | 0 | 0 | 0 | 0 | 1 | 0 | 0 | 0 | 0 | 0 | 0 | 0 | 0 | 0 | 0 | 0 | 1 |
| Betonica officinalis, CR | 0 | 0 | 0 | 0 | 0 | 0 | 0 | 0 | 0 | 0 | 0 | 0 | 0 | 0 | 0 | 0 | 0 | 0 | 0 | 1 | 0 | 0 | 0 | 1 |
| Bidens radiata, RE | 0 | 0 | 0 | 0 | 0 | 0 | 0 | 0 | 1 | 0 | 0 | 0 | 0 | 0 | 0 | 0 | 0 | 0 | 0 | 0 | 0 | 0 | 1 | 0 |
| Blysmus rufus, NT | 0 | 0 | 1 | 0 | 0 | 0 | 0 | 0 | 0 | 0 | 0 | 1 | 0 | 0 | 0 | 0 | 0 | 0 | 0 | 0 | 0 | 0 | 1 | 1 |
| Botrychium lunaria, NT | 0 | 0 | 0 | 0 | 0 | 0 | 1 | 1 | 1 | 0 | 0 | 0 | 1 | 0 | 0 | 0 | 0 | 1 | 0 | 0 | 1 | 1 | 2 | 1 |
| Botrychium matricariifolium, EN | 0 | 0 | 0 | 0 | 0 | 0 | 1 | 0 | 0 | 0 | 0 | 0 | 0 | 0 | 0 | 0 | 0 | 0 | 0 | 0 | 0 | 0 | 1 | 0 |
| Botrychium multifidum, EN | 0 | 0 | 0 | 0 | 0 | 0 | 0 | 0 | 0 | 0 | 0 | 0 | 0 | 0 | 0 | 0 | 0 | 0 | 0 | 0 | 1 | 0 | 1 | 0 |
| Brachypodium pinnatum, NT | 1 | 0 | 0 | 0 | 0 | 0 | 0 | 0 | 1 | 0 | 0 | 0 | 0 | 0 | 0 | 0 | 0 | 0 | 0 | 0 | 0 | 0 | 2 | 0 |
| Bromus racemosus, NT | 0 | 0 | 0 | 0 | 0 | 0 | 0 | 1 | 1 | 0 | 0 | 0 | 0 | 0 | 1 | 0 | 0 | 0 | 0 | 1 | 0 | 0 | 2 | 2 |
| Bupleurum tenuissimum, NT | 0 | 0 | 0 | 0 | 0 | 0 | 0 | 0 | 0 | 0 | 1 | 1 | 0 | 0 | 0 | 0 | 0 | 0 | 0 | 0 | 0 | 0 | 0 | 0 |
| Calamagrostis neglecta, NT | 0 | 0 | 0 | 0 | 0 | 0 | 0 | 0 | 1 | 0 | 0 | 0 | 0 | 0 | 0 | 0 | 0 | 0 | 0 | 0 | 0 | 0 | 1 | 0 |
| Campanula persicifolia, NT | 0 | 1 | 0 | 0 | 1 | 0 | 1 | 1 | 0 | 0 | 0 | 0 | 1 | 1 | 0 | 0 | 1 | 0 | 0 | 0 | 0 | 0 | 2 | 1 |
| Carex dioica, NT | 1 | 0 | 0 | 0 | 0 | 0 | 0 | 0 | 0 | 0 | 1 | 1 | 0 | 0 | 1 | 0 | 1 | 0 | 1 | 0 | 0 | 0 | 4 | 0 |
| Carex ericetorum, NT | 0 | 0 | 0 | 0 | 0 | 0 | 0 | 1 | 1 | 0 | 0 | 0 | 0 | 0 | 0 | 0 | 1 | 0 | 0 | 0 | 0 | 0 | 2 | 1 |
| Carex flava, NT | 1 | 0 | 0 | 0 | 0 | 0 | 1 | 0 | 0 | 1 | 0 | 1 | 0 | 0 | 0 | 0 | 0 | 0 | 0 | 1 | 0 | 0 | 2 | 3 |
| Carex lepidocarpa, NT | 1 | 0 | 0 | 1 | 0 | 0 | 0 | 0 | 1 | 0 | 0 | 0 | 0 | 0 | 0 | 0 | 1 | 1 | 1 | 0 | 0 | 0 | 3 | 1 |
| Carex limosa, NT | 0 | 0 | 0 | 0 | 0 | 1 | 0 | 0 | 1 | 0 | 0 | 0 | 0 | 0 | 1 | 0 | 1 | 0 | 0 | 0 | 0 | 0 | 3 | 1 |
| Carex montana, NT | 0 | 0 | 0 | 0 | 0 | 0 | 0 | 0 | 1 | 0 | 0 | 0 | 0 | 0 | 0 | 0 | 0 | 0 | 0 | 0 | 0 | 0 | 1 | 0 |
| Carex pulicaris, NT | 0 | 0 | 0 | 0 | 0 | 0 | 0 | 0 | 1 | 0 | 1 | 1 | 0 | 0 | 0 | 0 | 1 | 0 | 1 | 1 | 1 | 0 | 3 | 0 |
| Carex vulpina, NT | 1 | 0 | 0 | 0 | 0 | 0 | 0 | 0 | 0 | 0 | 0 | 0 | 0 | 0 | 0 | 0 | 0 | 0 | 1 | 1 | 0 | 0 | 1 | 0 |
| Carlina vulgaris, NT | 1 | 0 | 0 | 0 | 0 | 0 | 1 | 1 | 0 | 0 | 0 | 1 | 0 | 0 | 0 | 0 | 0 | 0 | 1 | 0 | 0 | 1 | 2 | 2 |
| Catabrosa aquatica, NT | 0 | 0 | 0 | 0 | 0 | 0 | 0 | 0 | 1 | 0 | 0 | 1 | 0 | 0 | 1 | 0 | 1 | 0 | 0 | 0 | 1 | 1 | 3 | 1 |
| Centaurium littorale, NT | 0 | 0 | 0 | 1 | 0 | 0 | 0 | 0 | 0 | 0 | 0 | 1 | 0 | 0 | 0 | 0 | 0 | 0 | 0 | 0 | 0 | 0 | 0 | 2 |
| Cephalanthera damasonium, VU | 1 | 1 | 0 | 0 | 0 | 0 | 1 | 1 | 0 | 0 | 0 | 0 | 0 | 0 | 0 | 0 | 0 | 0 | 0 | 0 | 0 | 0 | 0 | 0 |
| Cephalanthera longifolia, EN | 1 | 1 | 0 | 0 | 0 | 0 | 1 | 0 | 0 | 0 | 0 | 0 | 0 | 0 | 0 | 0 | 0 | 0 | 1 | 0 | 0 | 0 | 2 | 0 |
| Cephalanthera rubra, CR | 1 | 1 | 0 | 0 | 0 | 0 | 1 | 1 | 0 | 0 | 0 | 0 | 0 | 0 | 0 | 0 | 0 | 0 | 1 | 0 | 0 | 0 | 1 | 0 |
| Chimaphila umbellata, NT | 0 | 0 | 0 | 0 | 0 | 0 | 0 | 0 | 0 | 0 | 0 | 0 | 0 | 0 | 0 | 0 | 0 | 0 | 0 | 0 | 1 | 1 | 0 | 0 |
| Circaea alpina, NT | 0 | 0 | 0 | 0 | 1 | 1 | 1 | 0 | 1 | 0 | 1 | 1 | 0 | 0 | 1 | 0 | 0 | 0 | 1 | 0 | 0 | 0 | 4 | 0 |
| Cirsium heterophyllum, NT | 0 | 0 | 0 | 0 | 0 | 0 | 0 | 0 | 0 | 1 | 0 | 0 | 0 | 0 | 0 | 0 | 0 | 0 | 0 | 0 | 0 | 0 | 0 | 1 |
| Coeloglossum viride, RE | 0 | 0 | 0 | 0 | 0 | 0 | 1 | 0 | 0 | 0 | 0 | 0 | 0 | 0 | 0 | 0 | 0 | 0 | 0 | 0 | 0 | 0 | 1 | 0 |
| Corallorhiza trifida, VU | 0 | 0 | 0 | 0 | 0 | 0 | 1 | 1 | 0 | 0 | 0 | 0 | 0 | 0 | 0 | 0 | 0 | 0 | 0 | 0 | 1 | 1 | 0 | 0 |
| Corydalis pumila, NT | 0 | 0 | 1 | 0 | 0 | 0 | 1 | 0 | 0 | 0 | 0 | 1 | 0 | 0 | 0 | 0 | 0 | 0 | 0 | 0 | 0 | 0 | 2 | 1 |
| Crepis praemorsa, EN | 1 | 0 | 0 | 0 | 0 | 0 | 0 | 0 | 1 | 0 | 0 | 0 | 1 | 0 | 0 | 0 | 0 | 0 | 0 | 0 | 0 | 0 | 3 | 0 |
| Cuscuta epithymum, EN | 0 | 0 | 0 | 0 | 0 | 0 | 1 | 0 | 0 | 0 | 0 | 1 | 0 | 0 | 0 | 0 | 0 | 0 | 0 | 0 | 1 | 1 | 1 | 1 |
| Cuscuta europaea, NT | 1 | 0 | 0 | 0 | 0 | 0 | 0 | 0 | 0 | 0 | 0 | 0 | 1 | 1 | 0 | 0 | 0 | 0 | 0 | 0 | 0 | 0 | 1 | 0 |
| Cyperus fuscus, CR | 0 | 0 | 0 | 0 | 0 | 0 | 0 | 0 | 1 | 0 | 0 | 0 | 0 | 0 | 0 | 0 | 0 | 0 | 0 | 0 | 0 | 1 | 1 | 1 |
| Cystopteris fragilis, NT | 0 | 0 | 0 | 0 | 1 | 0 | 1 | 0 | 1 | 0 | 0 | 0 | 0 | 0 | 0 | 0 | 0 | 0 | 1 | 0 | 0 | 0 | 4 | 0 |
| Deschampsia setacea, NT | 0 | 0 | 0 | 0 | 0 | 1 | 0 | 0 | 0 | 0 | 0 | 0 | 0 | 0 | 0 | 0 | 0 | 0 | 0 | 0 | 0 | 0 | 0 | 1 |
| Dianthus armeria, EN | 0 | 0 | 0 | 0 | 0 | 0 | 1 | 0 | 0 | 0 | 0 | 1 | 1 | 0 | 0 | 0 | 0 | 0 | 0 | 0 | 0 | 0 | 2 | 1 |
| Dianthus superbus, NT | 0 | 0 | 0 | 0 | 0 | 0 | 0 | 0 | 1 | 0 | 0 | 1 | 0 | 0 | 0 | 0 | 0 | 0 | 0 | 0 | 0 | 0 | 1 | 1 |
| Drosera intermedia, NT | 0 | 0 | 0 | 0 | 0 | 1 | 0 | 0 | 0 | 0 | 0 | 0 | 0 | 0 | 0 | 0 | 0 | 0 | 1 | 0 | 1 | 0 | 2 | 1 |
| Eleocharis acicularis, NT | 0 | 0 | 0 | 0 | 1 | 1 | 0 | 0 | 1 | 0 | 0 | 0 | 0 | 0 | 0 | 0 | 1 | 0 | 1 | 0 | 0 | 0 | 3 | 0 |
| Eleocharis quinqueflora, NT | 0 | 0 | 0 | 0 | 0 | 0 | 0 | 0 | 0 | 0 | 1 | 1 | 0 | 0 | 1 | 0 | 1 | 0 | 0 | 0 | 0 | 0 | 2 | 0 |
| Epipactis atrorubens, NT | 0 | 0 | 0 | 0 | 0 | 0 | 1 | 1 | 0 | 0 | 0 | 0 | 0 | 0 | 0 | 0 | 0 | 0 | 0 | 0 | 0 | 0 | 0 | 0 |
| Epipactis leptochila, NT | 0 | 0 | 0 | 0 | 0 | 0 | 1 | 1 | 0 | 0 | 0 | 0 | 0 | 0 | 0 | 0 | 0 | 0 | 0 | 0 | 0 | 0 | 0 | 0 |
| Epipactis palustris, NT | 1 | 0 | 0 | 0 | 1 | 0 | 1 | 1 | 0 | 0 | 0 | 0 | 1 | 0 | 1 | 0 | 1 | 0 | 1 | 0 | 1 | 1 | 6 | 0 |
| Epipogium aphyllum, CR | 1 | 1 | 0 | 0 | 0 | 0 | 1 | 0 | 0 | 0 | 0 | 0 | 0 | 0 | 0 | 0 | 0 | 0 | 0 | 0 | 0 | 0 | 1 | 0 |
| Eriophorum gracile, CR | 0 | 0 | 0 | 0 | 0 | 0 | 0 | 0 | 0 | 0 | 0 | 0 | 1 | 0 | 0 | 0 | 0 | 0 | 0 | 0 | 0 | 0 | 1 | 0 |
| Eriophorum latifolium, EN | 0 | 0 | 0 | 0 | 1 | 0 | 1 | 1 | 1 | 0 | 0 | 1 | 0 | 0 | 1 | 0 | 0 | 0 | 1 | 0 | 0 | 0 | 4 | 1 |
| Erysimum strictum, EN | 0 | 0 | 0 | 0 | 0 | 0 | 1 | 1 | 0 | 0 | 0 | 0 | 0 | 0 | 0 | 0 | 0 | 0 | 0 | 0 | 0 | 1 | 0 | 1 |
| Euphrasia arctica, CR | 0 | 0 | 0 | 0 | 0 | 0 | 0 | 1 | 0 | 0 | 0 | 0 | 0 | 0 | 0 | 0 | 0 | 0 | 0 | 0 | 0 | 0 | 0 | 1 |
| Euphrasia micrantha, NT | 0 | 0 | 0 | 0 | 0 | 0 | 0 | 0 | 0 | 0 | 0 | 0 | 0 | 0 | 0 | 0 | 1 | 0 | 0 | 0 | 0 | 1 | 1 | 1 |
| Euphrasia officinalis (subsp. pratensis), RE | 1 | 0 | 0 | 0 | 0 | 0 | 0 | 0 | 0 | 0 | 0 | 0 | 0 | 0 | 0 | 0 | 0 | 0 | 0 | 0 | 0 | 0 | 1 | 0 |
| Euphrasia officinalis, RE | 0 | 1 | 0 | 0 | 0 | 0 | 0 | 0 | 0 | 0 | 0 | 0 | 0 | 0 | 0 | 0 | 0 | 0 | 0 | 0 | 0 | 0 | 0 | 1 |
| Fragaria viridis, NT | 0 | 0 | 0 | 0 | 0 | 0 | 1 | 1 | 0 | 0 | 0 | 1 | 0 | 0 | 0 | 1 | 0 | 0 | 0 | 0 | 0 | 1 | 0 | 3 |
| Galium sterneri, NT | 0 | 0 | 0 | 0 | 0 | 0 | 0 | 0 | 0 | 0 | 0 | 0 | 0 | 0 | 0 | 0 | 1 | 0 | 0 | 0 | 0 | 0 | 1 | 0 |
| Gentianella amarella, EN | 1 | 0 | 0 | 0 | 1 | 0 | 1 | 0 | 0 | 0 | 0 | 0 | 0 | 0 | 0 | 0 | 0 | 0 | 0 | 0 | 0 | 0 | 3 | 0 |
| Gentianella campestris (ssp. campestris), EN | 0 | 0 | 0 | 0 | 0 | 0 | 0 | 0 | 1 | 0 | 0 | 0 | 0 | 0 | 0 | 0 | 0 | 0 | 0 | 0 | 0 | 0 | 1 | 0 |
| Gentianella campestris, EN | 0 | 0 | 0 | 0 | 1 | 0 | 0 | 0 | 1 | 0 | 0 | 0 | 0 | 0 | 0 | 0 | 0 | 0 | 1 | 0 | 0 | 0 | 3 | 0 |
| Gentianella uliginosa, EN | 1 | 0 | 0 | 0 | 0 | 0 | 0 | 0 | 0 | 0 | 0 | 0 | 0 | 0 | 0 | 0 | 0 | 0 | 0 | 0 | 0 | 0 | 1 | 0 |
| Geranium palustre, NT | 1 | 1 | 0 | 0 | 1 | 1 | 0 | 0 | 0 | 0 | 0 | 0 | 1 | 0 | 0 | 0 | 0 | 0 | 1 | 1 | 0 | 0 | 1 | 0 |
| Gymnadenia conopsea, CR | 0 | 0 | 0 | 0 | 0 | 0 | 0 | 0 | 1 | 0 | 0 | 0 | 0 | 0 | 0 | 0 | 0 | 0 | 0 | 0 | 0 | 0 | 1 | 0 |
| Hammarbya paludosa, EN | 0 | 0 | 0 | 0 | 0 | 0 | 0 | 0 | 0 | 0 | 0 | 0 | 1 | 0 | 0 | 0 | 0 | 0 | 0 | 0 | 0 | 0 | 1 | 0 |
| Helianthemum nummularium, NT | 1 | 0 | 0 | 0 | 1 | 0 | 0 | 1 | 1 | 0 | 0 | 1 | 1 | 0 | 0 | 0 | 0 | 0 | 1 | 0 | 0 | 0 | 5 | 2 |
| Helichrysum arenarium, NT | 0 | 0 | 1 | 1 | 0 | 0 | 1 | 1 | 0 | 0 | 1 | 1 | 1 | 0 | 0 | 0 | 0 | 0 | 0 | 0 | 1 | 1 | 1 | 0 |
| Herminium monorchis, EN | 1 | 0 | 0 | 0 | 0 | 0 | 1 | 1 | 1 | 0 | 0 | 0 | 0 | 0 | 0 | 0 | 0 | 0 | 0 | 0 | 1 | 0 | 3 | 0 |
| Holosteum umbellatum, EN | 0 | 0 | 0 | 0 | 0 | 0 | 1 | 0 | 0 | 0 | 0 | 0 | 0 | 0 | 0 | 0 | 0 | 0 | 0 | 0 | 0 | 0 | 1 | 0 |
| Hypericum montanum, NT | 0 | 0 | 0 | 0 | 0 | 0 | 1 | 1 | 1 | 1 | 0 | 0 | 1 | 1 | 0 | 0 | 0 | 1 | 0 | 0 | 0 | 0 | 0 | 1 |
| Hypochaeris maculata, NT | 0 | 0 | 0 | 0 | 0 | 0 | 0 | 0 | 0 | 0 | 0 | 1 | 0 | 0 | 0 | 0 | 0 | 0 | 0 | 0 | 0 | 0 | 0 | 1 |
| Juncus alpinoarticulatus (subsp. alpinoarticulatus), CR | 0 | 0 | 0 | 0 | 0 | 0 | 0 | 0 | 1 | 0 | 0 | 0 | 0 | 0 | 0 | 0 | 0 | 0 | 0 | 0 | 0 | 0 | 1 | 0 |
| Juncus alpinoarticulatus (subsp. rariflorus), EN | 0 | 0 | 0 | 0 | 0 | 0 | 0 | 0 | 0 | 0 | 0 | 0 | 0 | 0 | 0 | 0 | 0 | 0 | 0 | 0 | 1 | 1 | 0 | 0 |
| Juncus capitatus, EN | 0 | 0 | 0 | 0 | 0 | 0 | 0 | 0 | 0 | 0 | 0 | 0 | 0 | 0 | 0 | 0 | 0 | 0 | 0 | 0 | 1 | 1 | 0 | 0 |
| Koeleria pyramidata, NT | 0 | 0 | 1 | 0 | 0 | 0 | 0 | 0 | 0 | 0 | 1 | 0 | 0 | 0 | 0 | 0 | 0 | 0 | 0 | 0 | 0 | 0 | 2 | 0 |
| Laserpitium latifolium, CR | 0 | 0 | 0 | 0 | 0 | 0 | 0 | 0 | 1 | 0 | 0 | 0 | 0 | 0 | 0 | 0 | 0 | 0 | 0 | 0 | 0 | 0 | 1 | 0 |
| Lathyrus niger, NT | 0 | 0 | 0 | 0 | 0 | 0 | 0 | 0 | 0 | 0 | 0 | 0 | 1 | 1 | 0 | 0 | 0 | 0 | 1 | 0 | 0 | 0 | 1 | 0 |
| Lathyrus vernus, NT | 1 | 1 | 0 | 0 | 1 | 0 | 1 | 1 | 1 | 0 | 0 | 0 | 1 | 0 | 1 | 0 | 0 | 0 | 0 | 0 | 0 | 0 | 4 | 0 |
| Limonium humile, NT | 0 | 0 | 1 | 0 | 0 | 0 | 0 | 0 | 0 | 0 | 1 | 1 | 0 | 0 | 0 | 0 | 0 | 0 | 0 | 0 | 0 | 0 | 1 | 0 |
| Limosella aquatica, EN | 0 | 0 | 0 | 0 | 0 | 0 | 0 | 0 | 1 | 0 | 0 | 0 | 0 | 0 | 0 | 0 | 1 | 0 | 0 | 0 | 0 | 0 | 2 | 0 |
| Liparis loeselii, EN | 0 | 0 | 0 | 0 | 0 | 0 | 1 | 0 | 0 | 0 | 0 | 0 | 0 | 0 | 0 | 0 | 0 | 0 | 1 | 0 | 0 | 0 | 2 | 0 |
| Lycopodium tristachyum, VU | 0 | 0 | 0 | 0 | 0 | 1 | 0 | 0 | 0 | 0 | 0 | 0 | 0 | 0 | 0 | 0 | 0 | 0 | 0 | 0 | 0 | 0 | 0 | 1 |
| Lythrum portula, VU | 0 | 0 | 0 | 0 | 1 | 0 | 0 | 0 | 0 | 0 | 0 | 0 | 0 | 0 | 0 | 0 | 0 | 1 | 1 | 0 | 0 | 0 | 2 | 1 |
| Melampyrum arvense, NT | 0 | 0 | 0 | 0 | 0 | 0 | 1 | 1 | 0 | 0 | 0 | 0 | 0 | 0 | 0 | 0 | 0 | 0 | 1 | 0 | 0 | 0 | 1 | 0 |
| Melampyrum cristatum, EN | 0 | 0 | 0 | 0 | 0 | 0 | 1 | 0 | 0 | 0 | 0 | 0 | 0 | 0 | 0 | 0 | 0 | 0 | 0 | 0 | 0 | 0 | 1 | 0 |
| Melampyrum nemorosum, NT | 1 | 1 | 0 | 0 | 1 | 0 | 0 | 0 | 0 | 0 | 0 | 0 | 1 | 0 | 0 | 0 | 0 | 0 | 1 | 0 | 0 | 0 | 3 | 0 |
| Melampyrum sylvaticum, EN | 0 | 0 | 0 | 0 | 1 | 1 | 0 | 0 | 0 | 0 | 0 | 0 | 0 | 0 | 0 | 0 | 0 | 0 | 0 | 0 | 0 | 0 | 0 | 0 |
| Moneses uniflora, EN | 0 | 0 | 0 | 0 | 1 | 0 | 1 | 0 | 0 | 0 | 0 | 0 | 0 | 0 | 0 | 0 | 0 | 0 | 0 | 0 | 1 | 1 | 2 | 0 |
| Montia minor, EN | 0 | 0 | 0 | 0 | 0 | 0 | 0 | 0 | 0 | 0 | 0 | 1 | 0 | 0 | 0 | 0 | 0 | 0 | 0 | 0 | 0 | 0 | 0 | 1 |
| Neotinea ustulata, CR | 1 | 0 | 0 | 0 | 0 | 0 | 1 | 0 | 0 | 0 | 0 | 0 | 1 | 0 | 0 | 0 | 0 | 0 | 0 | 0 | 0 | 0 | 3 | 0 |
| Odontites litoralis, EN | 0 | 0 | 0 | 0 | 0 | 0 | 0 | 0 | 0 | 0 | 1 | 0 | 0 | 0 | 0 | 0 | 0 | 0 | 0 | 0 | 0 | 0 | 1 | 0 |
| Oenanthe fistulosa, NT | 1 | 0 | 0 | 0 | 0 | 0 | 0 | 0 | 0 | 0 | 0 | 0 | 0 | 0 | 0 | 0 | 0 | 0 | 0 | 1 | 0 | 0 | 1 | 1 |
| Ophrys insectifera, CR | 1 | 1 | 0 | 0 | 0 | 0 | 0 | 0 | 0 | 0 | 0 | 0 | 0 | 0 | 0 | 0 | 0 | 0 | 0 | 0 | 0 | 0 | 0 | 0 |
| Orchis purpurea, NT | 0 | 0 | 0 | 0 | 0 | 0 | 1 | 1 | 0 | 0 | 0 | 0 | 0 | 0 | 0 | 0 | 0 | 0 | 0 | 0 | 0 | 0 | 0 | 0 |
| Orobanche elatior, EN | 1 | 0 | 0 | 0 | 0 | 0 | 0 | 0 | 0 | 0 | 0 | 0 | 0 | 0 | 0 | 0 | 0 | 0 | 0 | 0 | 0 | 0 | 1 | 0 |
| Orobanche reticulata, CR | 1 | 0 | 0 | 0 | 0 | 0 | 0 | 0 | 0 | 0 | 0 | 0 | 0 | 0 | 0 | 0 | 0 | 0 | 0 | 0 | 0 | 0 | 1 | 0 |
| Orthilia secunda, NT | 1 | 0 | 0 | 0 | 1 | 1 | 1 | 0 | 0 | 0 | 0 | 0 | 0 | 0 | 0 | 0 | 0 | 0 | 0 | 0 | 1 | 1 | 2 | 0 |
| Parapholis strigosa, EN | 0 | 0 | 0 | 0 | 0 | 0 | 0 | 0 | 0 | 0 | 0 | 1 | 0 | 0 | 0 | 0 | 0 | 0 | 0 | 0 | 0 | 0 | 0 | 1 |
| Parnassia palustris, NT | 1 | 1 | 0 | 0 | 1 | 1 | 1 | 1 | 0 | 0 | 0 | 1 | 0 | 0 | 0 | 0 | 1 | 1 | 0 | 0 | 1 | 0 | 1 | 1 |
| Pedicularis palustris, NT | 1 | 0 | 0 | 0 | 1 | 0 | 0 | 0 | 0 | 0 | 0 | 0 | 0 | 0 | 0 | 0 | 0 | 0 | 0 | 0 | 0 | 0 | 2 | 0 |
| Petrorhagia prolifera, NT | 0 | 0 | 0 | 0 | 0 | 0 | 1 | 0 | 0 | 0 | 0 | 0 | 0 | 0 | 0 | 0 | 0 | 0 | 0 | 0 | 0 | 0 | 1 | 0 |
| Phleum arenarium, NT | 0 | 0 | 0 | 0 | 0 | 0 | 1 | 0 | 0 | 0 | 0 | 0 | 0 | 0 | 0 | 0 | 0 | 0 | 0 | 0 | 1 | 1 | 1 | 0 |
| Pilularia globulifera, EN | 0 | 0 | 0 | 0 | 0 | 1 | 0 | 0 | 0 | 0 | 0 | 0 | 0 | 0 | 0 | 0 | 0 | 0 | 0 | 0 | 0 | 1 | 0 | 2 |
| Pinguicula vulgaris, NT | 1 | 0 | 0 | 0 | 1 | 0 | 1 | 1 | 0 | 0 | 1 | 1 | 0 | 0 | 0 | 0 | 0 | 0 | 0 | 0 | 0 | 0 | 2 | 0 |
| Platanthera bifolia, NT | 0 | 0 | 0 | 0 | 0 | 0 | 1 | 0 | 1 | 0 | 1 | 1 | 0 | 0 | 0 | 0 | 1 | 0 | 0 | 0 | 1 | 1 | 3 | 0 |
| Platanthera chlorantha, NT | 0 | 0 | 0 | 0 | 1 | 1 | 1 | 1 | 0 | 0 | 0 | 1 | 0 | 0 | 1 | 1 | 1 | 0 | 0 | 1 | 0 | 1 | 1 | 3 |
| Polygala serpyllifolia, NT | 0 | 0 | 0 | 0 | 0 | 0 | 0 | 0 | 0 | 0 | 0 | 0 | 0 | 0 | 0 | 0 | 1 | 1 | 0 | 0 | 0 | 0 | 0 | 0 |
| Potamogeton acutifolius, NT | 0 | 0 | 0 | 0 | 1 | 0 | 0 | 0 | 0 | 0 | 0 | 0 | 0 | 0 | 0 | 0 | 0 | 0 | 1 | 0 | 0 | 1 | 2 | 1 |
| Potamogeton alpinus, NT | 0 | 0 | 0 | 0 | 0 | 1 | 1 | 0 | 0 | 0 | 1 | 0 | 0 | 0 | 0 | 0 | 1 | 0 | 0 | 0 | 0 | 0 | 3 | 1 |
| Potamogeton coloratus, EN | 0 | 0 | 0 | 0 | 0 | 0 | 0 | 0 | 0 | 0 | 0 | 0 | 0 | 0 | 0 | 0 | 1 | 0 | 0 | 0 | 0 | 0 | 1 | 0 |
| Potamogeton gramineus, EN | 0 | 0 | 0 | 0 | 0 | 0 | 1 | 0 | 0 | 0 | 0 | 0 | 0 | 0 | 0 | 0 | 0 | 0 | 0 | 0 | 0 | 1 | 1 | 1 |
| Potamogeton lucens, NT | 0 | 0 | 0 | 0 | 0 | 0 | 0 | 0 | 0 | 1 | 0 | 0 | 0 | 0 | 0 | 0 | 1 | 0 | 1 | 0 | 0 | 0 | 2 | 1 |
| Potamogeton praelongus, EN | 0 | 0 | 0 | 0 | 0 | 1 | 1 | 0 | 0 | 0 | 0 | 0 | 0 | 0 | 0 | 0 | 0 | 0 | 1 | 0 | 0 | 0 | 2 | 1 |
| Potentilla sterilis, NT | 0 | 0 | 0 | 0 | 0 | 0 | 0 | 0 | 0 | 0 | 0 | 0 | 0 | 0 | 1 | 1 | 0 | 0 | 0 | 0 | 0 | 1 | 0 | 1 |
| Primula farinosa, EN | 0 | 0 | 0 | 0 | 0 | 0 | 0 | 0 | 1 | 0 | 0 | 0 | 0 | 0 | 0 | 0 | 0 | 0 | 0 | 0 | 0 | 0 | 1 | 0 |
| Pseudorchis albida, CR | 0 | 0 | 0 | 0 | 0 | 0 | 0 | 0 | 0 | 0 | 0 | 0 | 0 | 0 | 0 | 0 | 1 | 0 | 0 | 0 | 0 | 0 | 1 | 0 |
| Pulmonaria angustifolia, EN | 0 | 0 | 0 | 0 | 0 | 0 | 0 | 0 | 1 | 0 | 0 | 0 | 0 | 0 | 0 | 0 | 0 | 0 | 0 | 0 | 0 | 0 | 1 | 0 |
| Pulmonaria officinalis, RE | 0 | 0 | 0 | 0 | 0 | 0 | 0 | 1 | 0 | 0 | 0 | 0 | 0 | 0 | 0 | 0 | 0 | 0 | 0 | 0 | 0 | 0 | 0 | 1 |
| Pyrola chlorantha, EN | 0 | 0 | 0 | 0 | 0 | 0 | 0 | 0 | 0 | 0 | 0 | 0 | 0 | 0 | 0 | 0 | 0 | 0 | 0 | 0 | 1 | 0 | 1 | 0 |
| Pyrola media, NT | 0 | 0 | 0 | 0 | 0 | 0 | 0 | 0 | 0 | 0 | 0 | 0 | 0 | 0 | 0 | 0 | 1 | 0 | 0 | 0 | 1 | 1 | 1 | 0 |
| Pyrola rotundifolia (ssp. rotundifolia), EN | 0 | 0 | 0 | 0 | 0 | 0 | 0 | 0 | 1 | 0 | 0 | 0 | 0 | 0 | 0 | 0 | 0 | 0 | 0 | 0 | 0 | 0 | 1 | 0 |
| Radiola linoides, NT | 0 | 0 | 0 | 0 | 0 | 0 | 0 | 0 | 1 | 0 | 0 | 1 | 0 | 0 | 0 | 0 | 1 | 0 | 0 | 0 | 1 | 0 | 3 | 1 |
| Ranunculus reptans, EN | 0 | 0 | 0 | 0 | 1 | 0 | 0 | 0 | 0 | 0 | 0 | 0 | 0 | 0 | 0 | 0 | 0 | 0 | 0 | 0 | 0 | 0 | 1 | 0 |
| Rhinanthus angustifolius, NT | 0 | 0 | 0 | 0 | 0 | 1 | 0 | 0 | 0 | 1 | 0 | 1 | 0 | 0 | 0 | 0 | 0 | 0 | 0 | 0 | 0 | 0 | 0 | 3 |
| Rhynchospora alba, NT | 0 | 0 | 0 | 0 | 1 | 1 | 0 | 0 | 0 | 0 | 0 | 1 | 0 | 0 | 0 | 0 | 1 | 1 | 0 | 0 | 0 | 0 | 0 | 1 |
| Rubus chamaemorus, NT | 0 | 0 | 0 | 0 | 1 | 1 | 0 | 0 | 0 | 0 | 0 | 0 | 0 | 0 | 0 | 0 | 0 | 0 | 0 | 0 | 0 | 0 | 0 | 0 |
| Rumex crispus, NT | 1 | 1 | 0 | 1 | 1 | 1 | 0 | 1 | 0 | 1 | 1 | 1 | 0 | 1 | 0 | 1 | 1 | 1 | 0 | 1 | 0 | 1 | 0 | 7 |
| Sagina nodosa, NT | 1 | 0 | 0 | 0 | 1 | 0 | 0 | 0 | 0 | 0 | 0 | 1 | 0 | 0 | 0 | 0 | 1 | 0 | 1 | 0 | 1 | 1 | 4 | 1 |
| Sagina subulata, EN | 0 | 0 | 0 | 0 | 0 | 0 | 0 | 0 | 0 | 0 | 0 | 0 | 0 | 0 | 0 | 0 | 0 | 0 | 0 | 0 | 0 | 1 | 0 | 1 |
| Saxifraga hirculus, EN | 0 | 0 | 0 | 0 | 0 | 0 | 0 | 0 | 1 | 0 | 0 | 0 | 0 | 0 | 0 | 0 | 1 | 0 | 0 | 0 | 0 | 0 | 2 | 0 |
| Scabiosa columbaria, NT | 1 | 1 | 0 | 0 | 0 | 0 | 1 | 1 | 0 | 0 | 0 | 0 | 0 | 0 | 0 | 0 | 0 | 0 | 0 | 0 | 1 | 0 | 1 | 0 |
| Scheuchzeria palustris, EN | 0 | 0 | 0 | 0 | 1 | 1 | 0 | 0 | 0 | 0 | 0 | 0 | 0 | 0 | 0 | 0 | 0 | 0 | 0 | 0 | 0 | 0 | 0 | 0 |
| Sedum sexangulare, EN | 0 | 0 | 0 | 0 | 0 | 0 | 0 | 0 | 0 | 0 | 0 | 0 | 0 | 0 | 0 | 0 | 0 | 0 | 0 | 0 | 0 | 1 | 0 | 1 |
| Selinum carvifolia, NT | 1 | 1 | 0 | 0 | 0 | 1 | 0 | 1 | 1 | 0 | 1 | 1 | 0 | 1 | 0 | 0 | 0 | 0 | 0 | 1 | 0 | 0 | 1 | 4 |
| Serratula tinctoria, EN | 0 | 0 | 0 | 0 | 0 | 0 | 0 | 0 | 1 | 0 | 0 | 0 | 1 | 0 | 0 | 0 | 0 | 0 | 0 | 0 | 0 | 0 | 2 | 0 |
| Silene uniflora, NT | 0 | 0 | 0 | 0 | 0 | 0 | 1 | 0 | 0 | 0 | 0 | 0 | 0 | 0 | 0 | 0 | 0 | 0 | 0 | 0 | 0 | 0 | 1 | 0 |
| Stellaria crassifolia, EN | 0 | 0 | 0 | 0 | 0 | 0 | 0 | 0 | 1 | 0 | 1 | 1 | 0 | 0 | 0 | 0 | 1 | 0 | 0 | 0 | 0 | 0 | 2 | 0 |
| Taxus baccata, EN | 0 | 0 | 0 | 0 | 0 | 1 | 0 | 0 | 0 | 1 | 0 | 1 | 0 | 0 | 0 | 1 | 0 | 0 | 0 | 1 | 0 | 1 | 0 | 6 |
| Tephroseris palustris, EN | 0 | 0 | 0 | 0 | 1 | 0 | 0 | 0 | 0 | 0 | 0 | 0 | 0 | 0 | 0 | 0 | 0 | 0 | 1 | 0 | 1 | 1 | 2 | 0 |
| Thalictrum simplex, NT | 1 | 0 | 0 | 0 | 0 | 0 | 0 | 0 | 0 | 0 | 1 | 1 | 0 | 0 | 0 | 0 | 0 | 0 | 0 | 0 | 0 | 0 | 1 | 0 |
| Thesium ebracteatum, RE | 0 | 0 | 1 | 0 | 0 | 0 | 0 | 0 | 1 | 0 | 0 | 0 | 0 | 0 | 0 | 0 | 0 | 0 | 0 | 0 | 0 | 0 | 2 | 0 |
| Trichophorum alpinum, EN | 0 | 0 | 0 | 0 | 0 | 0 | 0 | 0 | 1 | 0 | 0 | 0 | 0 | 0 | 0 | 0 | 0 | 0 | 1 | 0 | 0 | 0 | 2 | 0 |
| Trifolium aureum, EN | 1 | 0 | 0 | 0 | 0 | 0 | 0 | 0 | 0 | 0 | 0 | 0 | 0 | 1 | 0 | 0 | 0 | 0 | 1 | 1 | 0 | 0 | 1 | 1 |
| Trollius europaeus, NT | 1 | 1 | 0 | 0 | 1 | 1 | 0 | 0 | 1 | 0 | 0 | 0 | 0 | 0 | 0 | 0 | 0 | 0 | 1 | 1 | 0 | 0 | 1 | 0 |
| Utricularia intermedia, NT | 0 | 0 | 0 | 0 | 0 | 0 | 0 | 0 | 1 | 0 | 0 | 0 | 0 | 0 | 0 | 0 | 0 | 0 | 0 | 0 | 0 | 0 | 1 | 0 |
| Utricularia vulgaris, NT | 0 | 0 | 0 | 0 | 1 | 1 | 0 | 0 | 0 | 1 | 0 | 0 | 0 | 0 | 0 | 0 | 0 | 1 | 1 | 0 | 0 | 1 | 1 | 3 |
| Veronica spicata, NT | 0 | 0 | 1 | 0 | 0 | 0 | 0 | 0 | 0 | 0 | 0 | 1 | 0 | 0 | 0 | 0 | 0 | 0 | 0 | 0 | 0 | 0 | 1 | 1 |
| Vicia cassubica, NT | 0 | 0 | 1 | 0 | 0 | 0 | 0 | 0 | 0 | 0 | 0 | 1 | 0 | 0 | 0 | 0 | 1 | 0 | 0 | 0 | 0 | 1 | 2 | 2 |
| Vicia dumetorum, VU | 0 | 0 | 0 | 0 | 0 | 0 | 0 | 0 | 0 | 0 | 0 | 1 | 0 | 0 | 0 | 1 | 0 | 0 | 0 | 0 | 0 | 0 | 0 | 2 |
| Vicia orobus, EN | 0 | 0 | 0 | 0 | 0 | 0 | 0 | 0 | 0 | 0 | 0 | 0 | 0 | 0 | 0 | 0 | 1 | 0 | 0 | 0 | 0 | 1 | 1 | 1 |
| Vicia tenuifolia, NT | 0 | 0 | 0 | 0 | 0 | 0 | 1 | 1 | 0 | 0 | 0 | 0 | 0 | 0 | 0 | 0 | 0 | 0 | 0 | 0 | 0 | 0 | 0 | 0 |
| Viola epipsila, CR | 0 | 0 | 0 | 0 | 0 | 0 | 0 | 0 | 1 | 0 | 0 | 0 | 0 | 0 | 0 | 0 | 0 | 0 | 1 | 0 | 0 | 0 | 2 | 0 |
| Viola mirabilis, VU | 1 | 1 | 0 | 0 | 0 | 0 | 0 | 0 | 1 | 0 | 0 | 0 | 0 | 0 | 0 | 0 | 0 | 0 | 0 | 0 | 0 | 0 | 1 | 0 |

**Supplementary information S11.** T-test results (paired, one-tailed) on red-listed and sensitive vascular plant species that disappeared from and persisted in the 11 localities, respectively, and their mean trait values. Trait, locality, mean trait values for persisting red listed and sensitive plant species (Mean_persisting), mean trait values for red listed and sensitive plant species that disappeared (Mean_disappeared), t-value (T_value), degrees of freedom (DF), p-value (P_Value) and significance (* (p < 0.05), ** (p < 0.01), *** (p < 0.001)) are given.

| **Trait** | **Locality** | **Mean_persisting** | **Mean_diappeared** | **T_Value** | **DF** | **P_Value** | **Significance** |
| --- | --- | --- | --- | --- | --- | --- | --- |
| ell_L | Pamhule skov | 4.731 | 6.238 | -2.967 | 32.368 | 0.006 | ** |
| ell_L | Sorø Sønderskov | 6.298 | 6.976 | -2.253 | 86.971 | 0.027 | * |
| ell_L | Allindelille | 6.114 | 7.262 | -4.556 | 109.173 | 0.000 | *** |
| ell_L | Høje Møn | 6.494 | 6.868 | -1.252 | 74.425 | 0.215 |  |
| ell_L | Gribskov | 6.203 | 7.321 | -3.810 | 75.434 | 0.000 | *** |
| ell_L | Jonstrup Vang | 5.607 | 7.274 | -4.992 | 39.895 | 0.000 | *** |
| ell_L | Jægerspris Nordskov | 7.354 | 6.857 | 1.347 | 8.271 | 0.214 |  |
| ell_L | Simested | 7.049 | 7.146 | -0.351 | 79.620 | 0.727 |  |
| ell_L | Tisvilde | 7.017 | 8.000 | -5.560 | 58.000 | 0.000 | *** |
| ell_L | Køge Ås | 5.455 | 7.379 | -4.160 | 12.823 | 0.001 | ** |
| ell_L | Færgelunden | 6.077 | 7.273 | -1.629 | 21.985 | 0.118 |  |
| ell_F | Pamhule skov | 5.692 | 7.286 | -3.225 | 31.866 | 0.003 | ** |
| ell_F | Sorø Sønderskov | 6.277 | 6.881 | -1.120 | 64.506 | 0.267 |  |
| ell_F | Allindelille | 5.486 | 6.333 | -2.159 | 67.172 | 0.034 | * |
| ell_F | Høje Møn | 4.897 | 5.974 | -2.459 | 47.530 | 0.018 | * |
| ell_F | Gribskov | 6.068 | 6.179 | -0.203 | 39.624 | 0.840 |  |
| ell_F | Jonstrup Vang | 5.714 | 6.658 | -2.384 | 63.490 | 0.020 | * |
| ell_F | Jægerspris Nordskov | 5.976 | 7.143 | -0.984 | 6.489 | 0.360 |  |
| ell_F | Simested | 6.780 | 7.439 | -1.303 | 67.417 | 0.197 |  |
| ell_F | Tisvilde | 5.508 | 7.222 | -2.336 | 10.632 | 0.040 | * |
| ell_F | Køge Ås | 5.818 | 6.241 | -0.570 | 18.304 | 0.576 |  |
| ell_F | Færgelunden | 5.846 | 5.273 | 0.745 | 14.014 | 0.469 |  |
| ell_R | Pamhule skov | 6.077 | 5.905 | 0.392 | 37.562 | 0.697 |  |
| ell_R | Sorø Sønderskov | 6.043 | 6.548 | -1.802 | 86.586 | 0.075 |  |
| ell_R | Allindelille | 6.471 | 6.119 | 1.034 | 65.319 | 0.305 |  |
| ell_R | Høje Møn | 6.529 | 5.921 | 1.801 | 57.347 | 0.077 |  |
| ell_R | Gribskov | 5.189 | 6.179 | -2.421 | 57.664 | 0.019 | * |
| ell_R | Jonstrup Vang | 5.857 | 5.918 | -0.173 | 56.053 | 0.863 |  |
| ell_R | Jægerspris Nordskov | 5.793 | 5.143 | 0.819 | 6.797 | 0.441 |  |
| ell_R | Simested | 4.171 | 5.512 | -3.506 | 78.282 | 0.001 | *** |
| ell_R | Tisvilde | 5.271 | 5.000 | 0.325 | 9.517 | 0.752 |  |
| ell_R | Køge Ås | 5.909 | 5.621 | 0.472 | 23.584 | 0.641 |  |
| ell_R | Færgelunden | 6.077 | 5.909 | 0.238 | 20.238 | 0.814 |  |
| ell_N | Pamhule skov | 5.115 | 4.143 | 2.066 | 29.700 | 0.048 | * |
| ell_N | Sorø Sønderskov | 4.106 | 3.738 | 1.088 | 85.478 | 0.280 |  |
| ell_N | Allindelille | 4.114 | 3.000 | 3.878 | 91.386 | 0.000 | *** |
| ell_N | Høje Møn | 3.552 | 3.105 | 1.715 | 78.507 | 0.090 |  |
| ell_N | Gribskov | 3.473 | 2.821 | 2.101 | 63.507 | 0.040 | * |
| ell_N | Jonstrup Vang | 4.321 | 2.973 | 3.961 | 45.669 | 0.000 | *** |
| ell_N | Jægerspris Nordskov | 3.354 | 3.429 | -0.146 | 7.678 | 0.887 |  |
| ell_N | Simested | 2.780 | 3.171 | -1.099 | 79.477 | 0.275 |  |
| ell_N | Tisvilde | 2.949 | 1.889 | 3.706 | 28.979 | 0.001 | *** |
| ell_N | Køge Ås | 4.091 | 3.069 | 1.599 | 16.082 | 0.129 |  |
| ell_N | Færgelunden | 5.308 | 3.455 | 2.931 | 17.729 | 0.009 | ** |
| ellN_R | Pamhule skov | 0.867 | 0.740 | 1.495 | 30.574 | 0.145 |  |
| ellN_R | Sorø Sønderskov | 0.691 | 0.589 | 1.825 | 82.714 | 0.072 |  |
| ellN_R | Allindelille | 0.662 | 0.541 | 2.178 | 77.176 | 0.032 | * |
| ellN_R | Høje Møn | 0.570 | 0.587 | -0.280 | 58.091 | 0.780 |  |
| ellN_R | Gribskov | 0.719 | 0.475 | 4.711 | 75.416 | 0.000 | *** |
| ellN_R | Jonstrup Vang | 0.757 | 0.527 | 4.353 | 52.511 | 0.000 | *** |
| ellN_R | Jægerspris Nordskov | 0.610 | 0.820 | -1.015 | 6.275 | 0.348 |  |
| ellN_R | Simested | 0.704 | 0.622 | 1.150 | 77.909 | 0.254 |  |
| ellN_R | Tisvilde | 0.596 | 0.425 | 2.964 | 20.265 | 0.008 | ** |
| ellN_R | Køge Ås | 0.715 | 0.556 | 1.618 | 15.395 | 0.126 |  |
| ellN_R | Færgelunden | 0.915 | 0.629 | 2.198 | 16.594 | 0.042 | * |
| Grime_C | Pamhule skov | 5.778 | 4.583 | 1.574 | 48.826 | 0.122 |  |
| Grime_C | Sorø Sønderskov | 6.824 | 3.875 | 4.270 | 91.945 | 0.000 | *** |
| Grime_C | Allindelille | 6.320 | 4.000 | 3.814 | 120.076 | 0.000 | *** |
| Grime_C | Høje Møn | 5.143 | 3.500 | 2.823 | 104.947 | 0.006 | ** |
| Grime_C | Gribskov | 5.221 | 3.938 | 1.912 | 67.703 | 0.060 |  |
| Grime_C | Jonstrup Vang | 6.483 | 4.689 | 2.188 | 37.542 | 0.035 | * |
| Grime_C | Jægerspris Nordskov | 4.703 | 3.778 | 0.643 | 9.159 | 0.536 |  |
| Grime_C | Simested | 6.233 | 3.455 | 3.821 | 81.006 | 0.000 | *** |
| Grime_C | Tisvilde | 5.365 | 2.727 | 3.078 | 24.448 | 0.005 | ** |
| Grime_C | Køge Ås | 4.462 | 5.676 | -1.217 | 24.319 | 0.235 |  |
| Grime_C | Færgelunden | 7.000 | 4.421 | 1.621 | 17.712 | 0.123 |  |
| Grime_R | Pamhule skov | 1.778 | 2.333 | -0.920 | 46.580 | 0.362 |  |
| Grime_R | Sorø Sønderskov | 1.765 | 2.625 | -1.560 | 78.763 | 0.123 |  |
| Grime_R | Allindelille | 2.080 | 2.500 | -0.838 | 86.059 | 0.404 |  |
| Grime_R | Høje Møn | 2.633 | 2.875 | -0.526 | 88.039 | 0.600 |  |
| Grime_R | Gribskov | 1.792 | 2.625 | -1.491 | 51.476 | 0.142 |  |
| Grime_R | Jonstrup Vang | 1.517 | 2.622 | -2.495 | 55.814 | 0.016 | * |
| Grime_R | Jægerspris Nordskov | 2.462 | 1.778 | 0.716 | 9.741 | 0.491 |  |
| Grime_R | Simested | 1.070 | 2.227 | -2.184 | 72.788 | 0.032 | * |
| Grime_R | Tisvilde | 1.651 | 2.727 | -1.421 | 15.665 | 0.175 |  |
| Grime_R | Køge Ås | 2.154 | 2.108 | 0.068 | 21.316 | 0.946 |  |
| Grime_R | Færgelunden | 1.000 | 2.842 | -2.409 | 30.044 | 0.022 | * |
| Grime_S | Pamhule skov | 4.444 | 4.083 | 0.490 | 46.965 | 0.626 |  |
| Grime_S | Sorø Sønderskov | 3.176 | 3.500 | -0.595 | 96.482 | 0.553 |  |
| Grime_S | Allindelille | 3.120 | 4.750 | -2.922 | 89.218 | 0.004 | ** |
| Grime_S | Høje Møn | 3.612 | 4.125 | -1.001 | 86.453 | 0.319 |  |
| Grime_S | Gribskov | 4.519 | 4.688 | -0.234 | 57.460 | 0.816 |  |
| Grime_S | Jonstrup Vang | 3.586 | 4.289 | -1.038 | 40.606 | 0.306 |  |
| Grime_S | Jægerspris Nordskov | 4.703 | 5.111 | -0.325 | 9.350 | 0.752 |  |
| Grime_S | Simested | 4.698 | 4.136 | 0.750 | 84.389 | 0.455 |  |
| Grime_S | Tisvilde | 4.413 | 6.545 | -1.805 | 14.143 | 0.092 |  |
| Grime_S | Køge Ås | 4.462 | 4.216 | 0.253 | 22.062 | 0.802 |  |
| Grime_S | Færgelunden | 4.000 | 4.105 | -0.076 | 16.381 | 0.941 |  |

**Supplementary information S12. Grime indicator values:** Historical and current locality mean Grime values and grazing/mowing affinity based on plant species lists in the 11 localities. A: competition (Grime C), B: ruderalism (Grime R), C: stress-tolerance (Grime S) and D: grazing/mowing affinity according to Tyler et al. 2021.

**
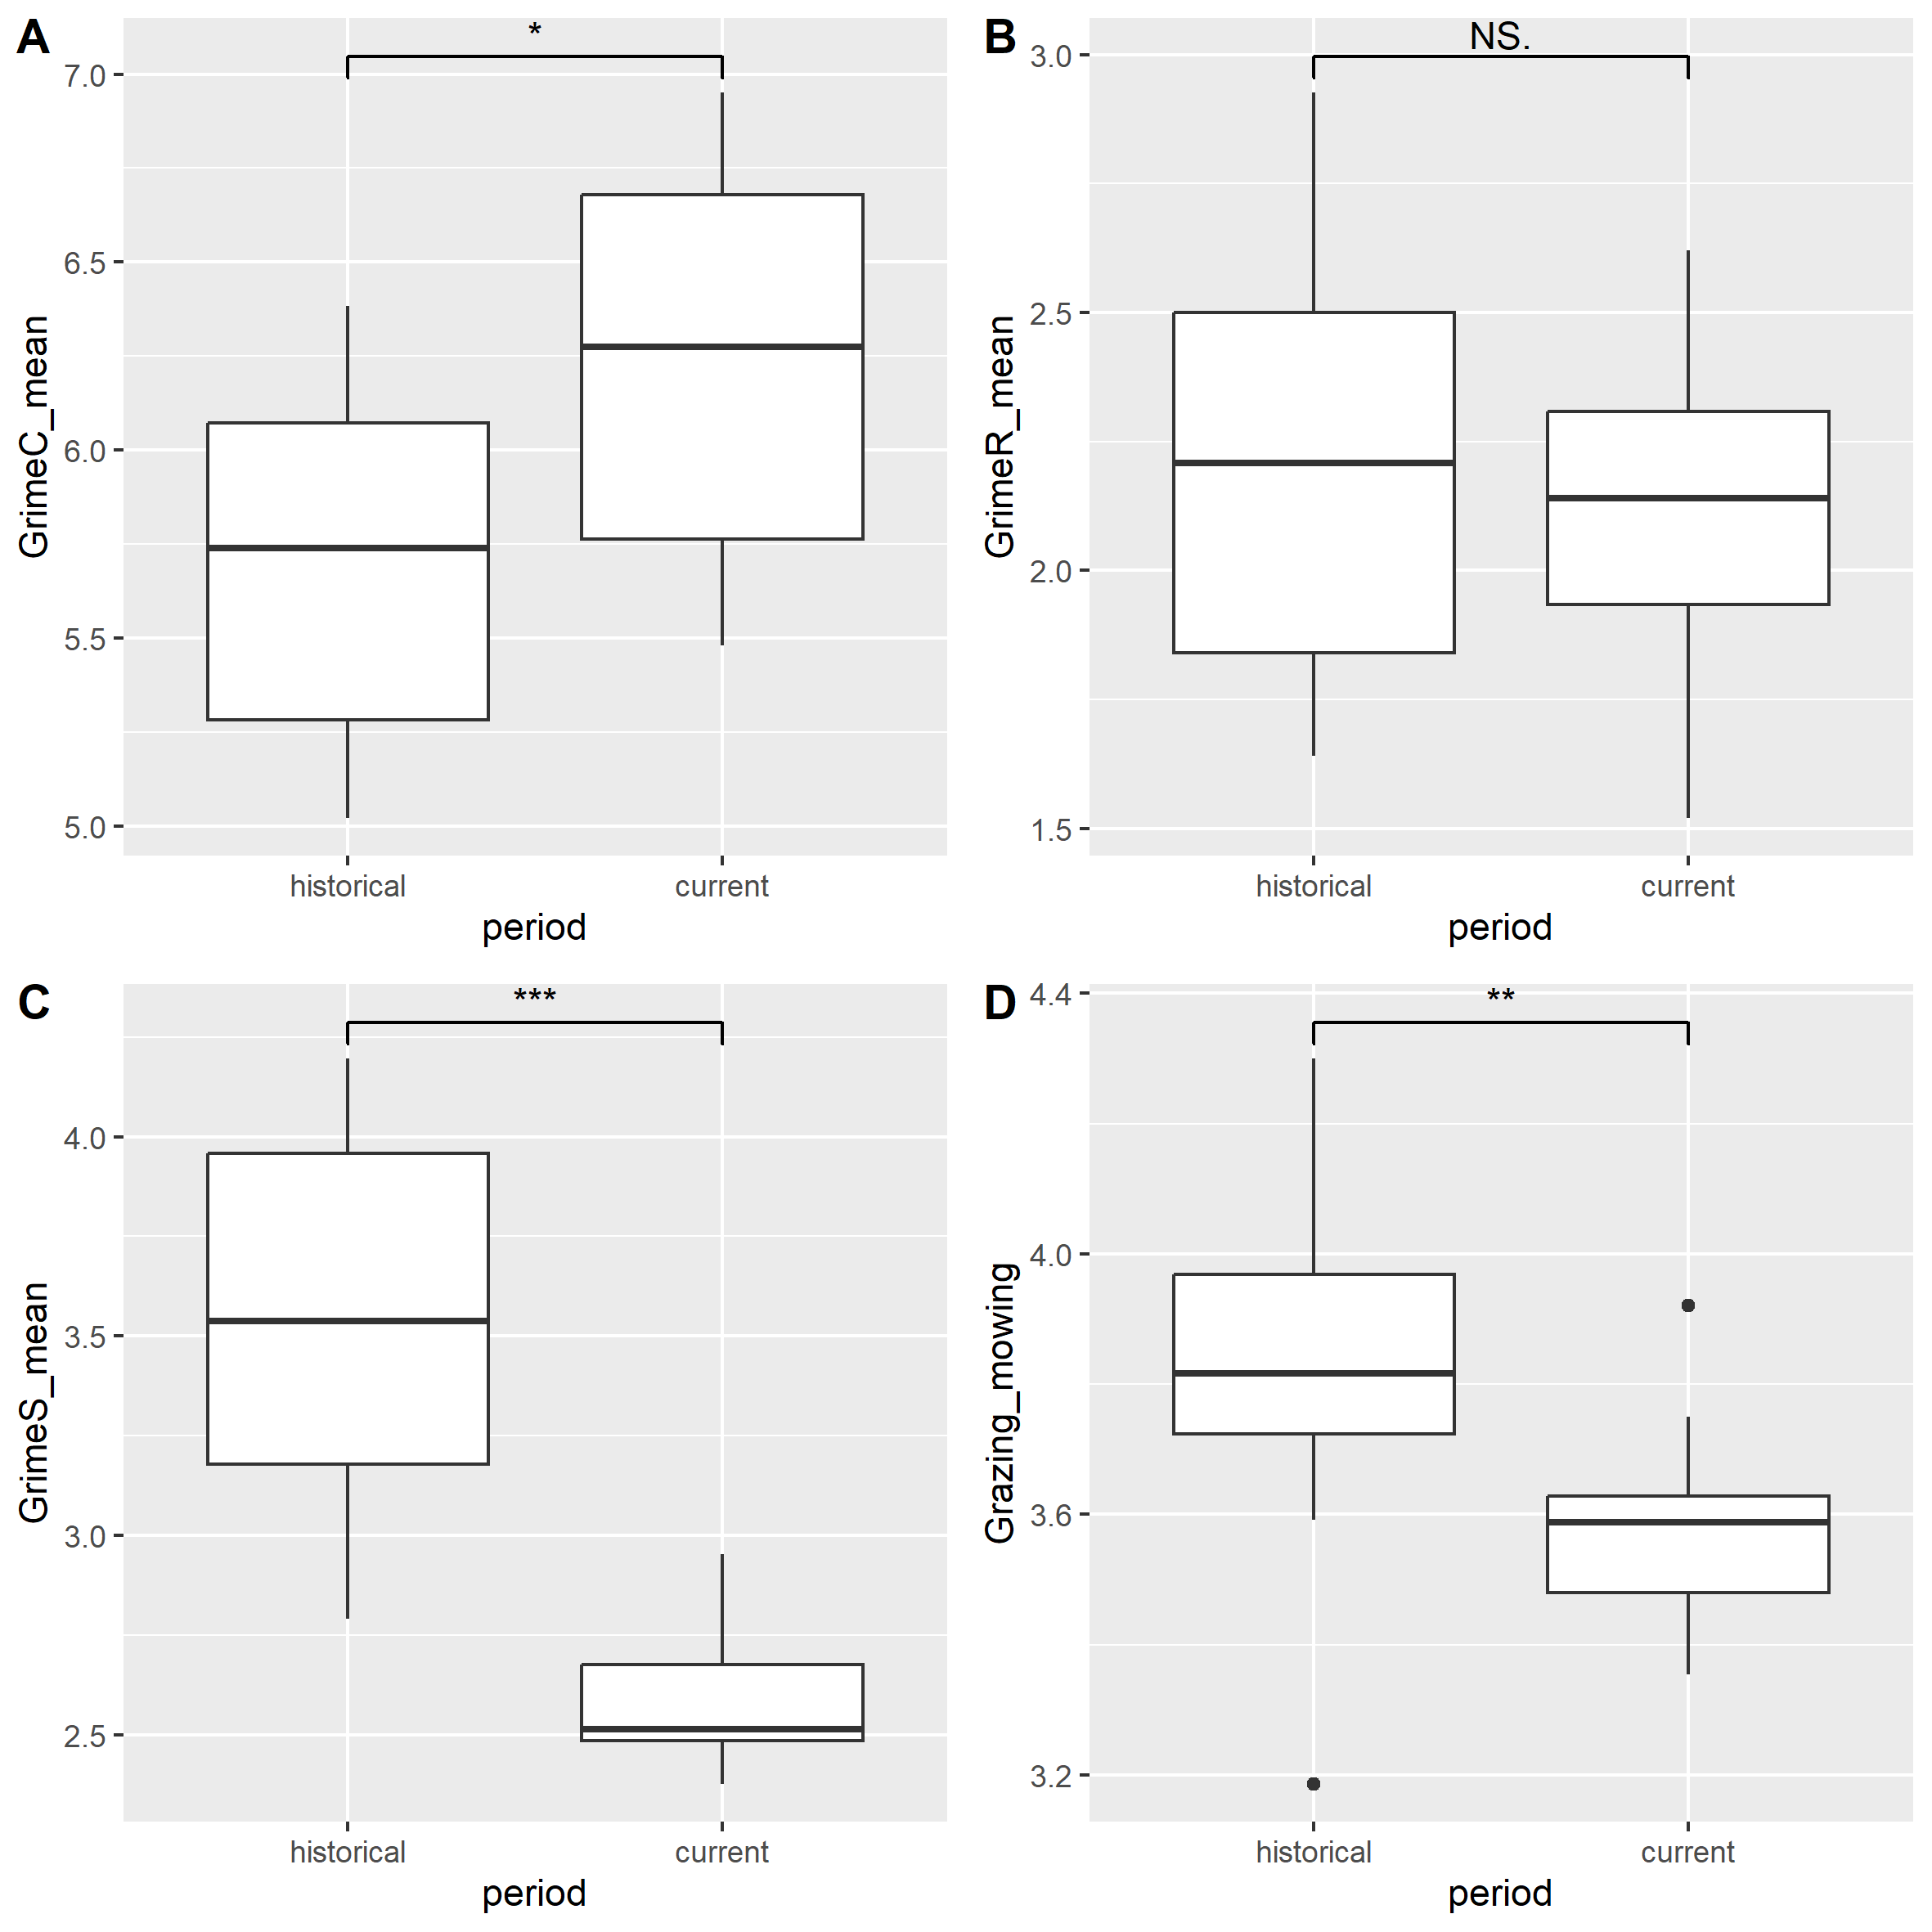
**

**Supplementary information S13:** Winner and loser species for each taxonomic group (butterfly (p<0.05 or p<0.2 level), bird (p<0.05))

| **Group** | **Species** | **Winner/loser** | **Criteria** |
| --- | --- | --- | --- |
| Butterfly | Apatura iris | Winner | Binomial GLM, p<0.05 |
| Butterfly | Vanessa cardui | Winner | Binomial GLM, p<0.2 |
| Butterfly | Boloria aquilonaris | Loser | Binomial GLM, p<0.2 |
| Butterfly | Boloria euphrosyne | Loser | Binomial GLM, p<0.05 |
| Butterfly | Boloria selene | Loser | Binomial GLM, p<0.2 |
| Butterfly | Cupido minimus | Loser | Binomial GLM, p<0.05 |
| Butterfly | Erynnis tages | Loser | Binomial GLM, p<0.2 |
| Butterfly | Fabriciana adippe | Loser | Binomial GLM, p<0.05 |
| Butterfly | Lycaena hippothoe | Loser | Binomial GLM, p<0.05 |
| Butterfly | Melitaea cinxia | Loser | Binomial GLM, p<0.05 |
| Butterfly | Melitaea diamina | Loser | Binomial GLM, p<0.05 |
| Butterfly | Nymphalis polychloros | Loser | Binomial GLM, p<0.05 |
| Butterfly | Plebejus argus | Loser | Binomial GLM, p<0.2 |
| Butterfly | Plebejus idas | Loser | Binomial GLM, p<0.2 |
| Butterfly | Polyommatus amandus | Loser | Binomial GLM, p<0.05 |
| Butterfly | Pyrgus malvae | Loser | Binomial GLM, p<0.2 |
| Bird | Acrocephalus palustris | Winner | Meltofte et al. 2021 |
| Bird | Anthus trivialis | Winner | Meltofte et al. 2021 |
| Bird | Apus apus | Winner | Meltofte et al. 2021 |
| Bird | Ardea cinerea | Winner | Meltofte et al. 2021 |
| Bird | Asio otus | Winner | Meltofte et al. 2021 |
| Bird | Branta leucopsis | Winner | Meltofte et al. 2021 |
| Bird | Carduelis carduelis | Winner | Meltofte et al. 2021 |
| Bird | Certhia brachydactyla | Winner | Meltofte et al. 2021 |
| Bird | Certhia familiaris | Winner | Meltofte et al. 2021 |
| Bird | Charadrius dubius | Winner | Meltofte et al. 2021 |
| Bird | Chloris chloris | Winner | Meltofte et al. 2021 |
| Bird | Coccothraustes coccothraustes | Winner | Meltofte et al. 2021 |
| Bird | Columba oenas | Winner | Meltofte et al. 2021 |
| Bird | Columba palumbus | Winner | Meltofte et al. 2021 |
| Bird | Corvus corone | Winner | Meltofte et al. 2021 |
| Bird | Corvus frugilegus | Winner | Meltofte et al. 2021 |
| Bird | Corvus monedula | Winner | Meltofte et al. 2021 |
| Bird | Curruca communis | Winner | Meltofte et al. 2021 |
| Bird | Cyanistes caeruleus | Winner | Meltofte et al. 2021 |
| Bird | Dendrocopos major | Winner | Meltofte et al. 2021 |
| Bird | Dendrocopos minor | Winner | Meltofte et al. 2021 |
| Bird | Erithacus rubecula | Winner | Meltofte et al. 2021 |
| Bird | Falco tinnunculus | Winner | Meltofte et al. 2021 |
| Bird | Ficedula parva | Winner | Meltofte et al. 2021 |
| Bird | Fringilla coelebs | Winner | Meltofte et al. 2021 |
| Bird | Ichthyaetus melanocephalus | Winner | Meltofte et al. 2021 |
| Bird | Jynx torquilla | Winner | Meltofte et al. 2021 |
| Bird | Larus argentatus | Winner | Meltofte et al. 2021 |
| Bird | Larus fuscus | Winner | Meltofte et al. 2021 |
| Bird | Larus marinus | Winner | Meltofte et al. 2021 |
| Bird | Locustella luscinioides | Winner | Meltofte et al. 2021 |
| Bird | Lullula arborea | Winner | Meltofte et al. 2021 |
| Bird | Luscinia svecica | Winner | Meltofte et al. 2021 |
| Bird | Motacilla alba | Winner | Meltofte et al. 2021 |
| Bird | Muscicapa striata | Winner | Meltofte et al. 2021 |
| Bird | Panurus biarmicus | Winner | Meltofte et al. 2021 |
| Bird | Passer montanus | Winner | Meltofte et al. 2021 |
| Bird | Phoenicurus phoenicurus | Winner | Meltofte et al. 2021 |
| Bird | Phylloscopus collybita | Winner | Meltofte et al. 2021 |
| Bird | Pica pica | Winner | Meltofte et al. 2021 |
| Bird | Platalea leucorodia | Winner | Meltofte et al. 2021 |
| Bird | Poecile montanus | Winner | Meltofte et al. 2021 |
| Bird | Poecile palustris | Winner | Meltofte et al. 2021 |
| Bird | Pyrrhula pyrrhula | Winner | Meltofte et al. 2021 |
| Bird | Rallus aquaticus | Winner | Meltofte et al. 2021 |
| Bird | Regulus ignicapilla | Winner | Meltofte et al. 2021 |
| Bird | Remiz pendulinus | Winner | Meltofte et al. 2021 |
| Bird | Saxicola rubicola | Winner | Meltofte et al. 2021 |
| Bird | Scolopax rusticola | Winner | Meltofte et al. 2021 |
| Bird | Serinus serinus | Winner | Meltofte et al. 2021 |
| Bird | Sitta europaea | Winner | Meltofte et al. 2021 |
| Bird | Streptopelia turtur | Winner | Meltofte et al. 2021 |
| Bird | Sylvia atricapilla | Winner | Meltofte et al. 2021 |
| Bird | Tringa ochropus | Winner | Meltofte et al. 2021 |
| Bird | Troglodytes troglodytes | Winner | Meltofte et al. 2021 |
| Bird | Turdus merula | Winner | Meltofte et al. 2021 |
| Bird | Turdus philomelos | Winner | Meltofte et al. 2021 |
| Bird | Tyto alba | Winner | Meltofte et al. 2021 |
| Bird | Acrocephalus schoenobaenus | Loser | Meltofte et al. 2021 |
| Bird | Alauda arvensis | Loser | Meltofte et al. 2021 |
| Bird | Anthus campestris | Loser | Meltofte et al. 2021 |
| Bird | Anthus pratensis | Loser | Meltofte et al. 2021 |
| Bird | Arenaria interpres | Loser | Meltofte et al. 2021 |
| Bird | Asio flammeus | Loser | Meltofte et al. 2021 |
| Bird | Athene noctua | Loser | Meltofte et al. 2021 |
| Bird | Calidris alpina | Loser | Meltofte et al. 2021 |
| Bird | Calidris pugnax | Loser | Meltofte et al. 2021 |
| Bird | Charadrius alexandrinus | Loser | Meltofte et al. 2021 |
| Bird | Charadrius hiaticula | Loser | Meltofte et al. 2021 |
| Bird | Chlidonias niger | Loser | Meltofte et al. 2021 |
| Bird | Ciconia ciconia | Loser | Meltofte et al. 2021 |
| Bird | Ciconia nigra | Loser | Meltofte et al. 2021 |
| Bird | Circus cyaneus | Loser | Meltofte et al. 2021 |
| Bird | Coracias garrulus | Loser | Meltofte et al. 2021 |
| Bird | Crex crex | Loser | Meltofte et al. 2021 |
| Bird | Cuculus canorus | Loser | Meltofte et al. 2021 |
| Bird | Dendrocopos medius | Loser | Meltofte et al. 2021 |
| Bird | Emberiza citrinella | Loser | Meltofte et al. 2021 |
| Bird | Falco subbuteo | Loser | Meltofte et al. 2021 |
| Bird | Gallinago gallinago | Loser | Meltofte et al. 2021 |
| Bird | Gallinago media | Loser | Meltofte et al. 2021 |
| Bird | Gelochelidon nilotica | Loser | Meltofte et al. 2021 |
| Bird | Hippolais icterina | Loser | Meltofte et al. 2021 |
| Bird | Lanius collurio | Loser | Meltofte et al. 2021 |
| Bird | Linaria cannabina | Loser | Meltofte et al. 2021 |
| Bird | Lyrurus tetrix | Loser | Meltofte et al. 2021 |
| Bird | Motacilla flava | Loser | Meltofte et al. 2021 |
| Bird | Oenanthe oenanthe | Loser | Meltofte et al. 2021 |
| Bird | Passer domesticus | Loser | Meltofte et al. 2021 |
| Bird | Perdix perdix | Loser | Meltofte et al. 2021 |
| Bird | Picus viridis | Loser | Meltofte et al. 2021 |
| Bird | Pluvialis apricaria | Loser | Meltofte et al. 2021 |
| Bird | Porzana porzana | Loser | Meltofte et al. 2021 |
| Bird | Saxicola rubetra | Loser | Meltofte et al. 2021 |
| Bird | Schoeniclus schoeniclus | Loser | Meltofte et al. 2021 |
| Bird | Sterna paradisaea | Loser | Meltofte et al. 2021 |
| Bird | Sternula albifrons | Loser | Meltofte et al. 2021 |
| Bird | Sturnus vulgaris | Loser | Meltofte et al. 2021 |
| Bird | Tringa glareola | Loser | Meltofte et al. 2021 |
| Bird | Tringa totanus | Loser | Meltofte et al. 2021 |
| Bird | Upupa epops | Loser | Meltofte et al. 2021 |
| Bird | Vanellus vanellus | Loser | Meltofte et al. 2021 |

**Supplementary information S14:** Conditional plot for winner (white) and loser (grey) breeding bird species and A: trophic level, B: migration, C: vegetation structure and D: habitat.

**

**

**Supplementary information S15: Ellenberg indicator values:** Historical and current locality mean Ellenberg values (_avg) and mean Ellenberg standard deviation (_sd) based on plant species lists in the 11 localities. A: variation in Ellenberg R (ell_R_sd), B: mean Ellenberg R (ell_R_avg), C: variation in Ellenberg N (ell_N_sd), and D: mean Ellenberg N (ell_N_avg).

**
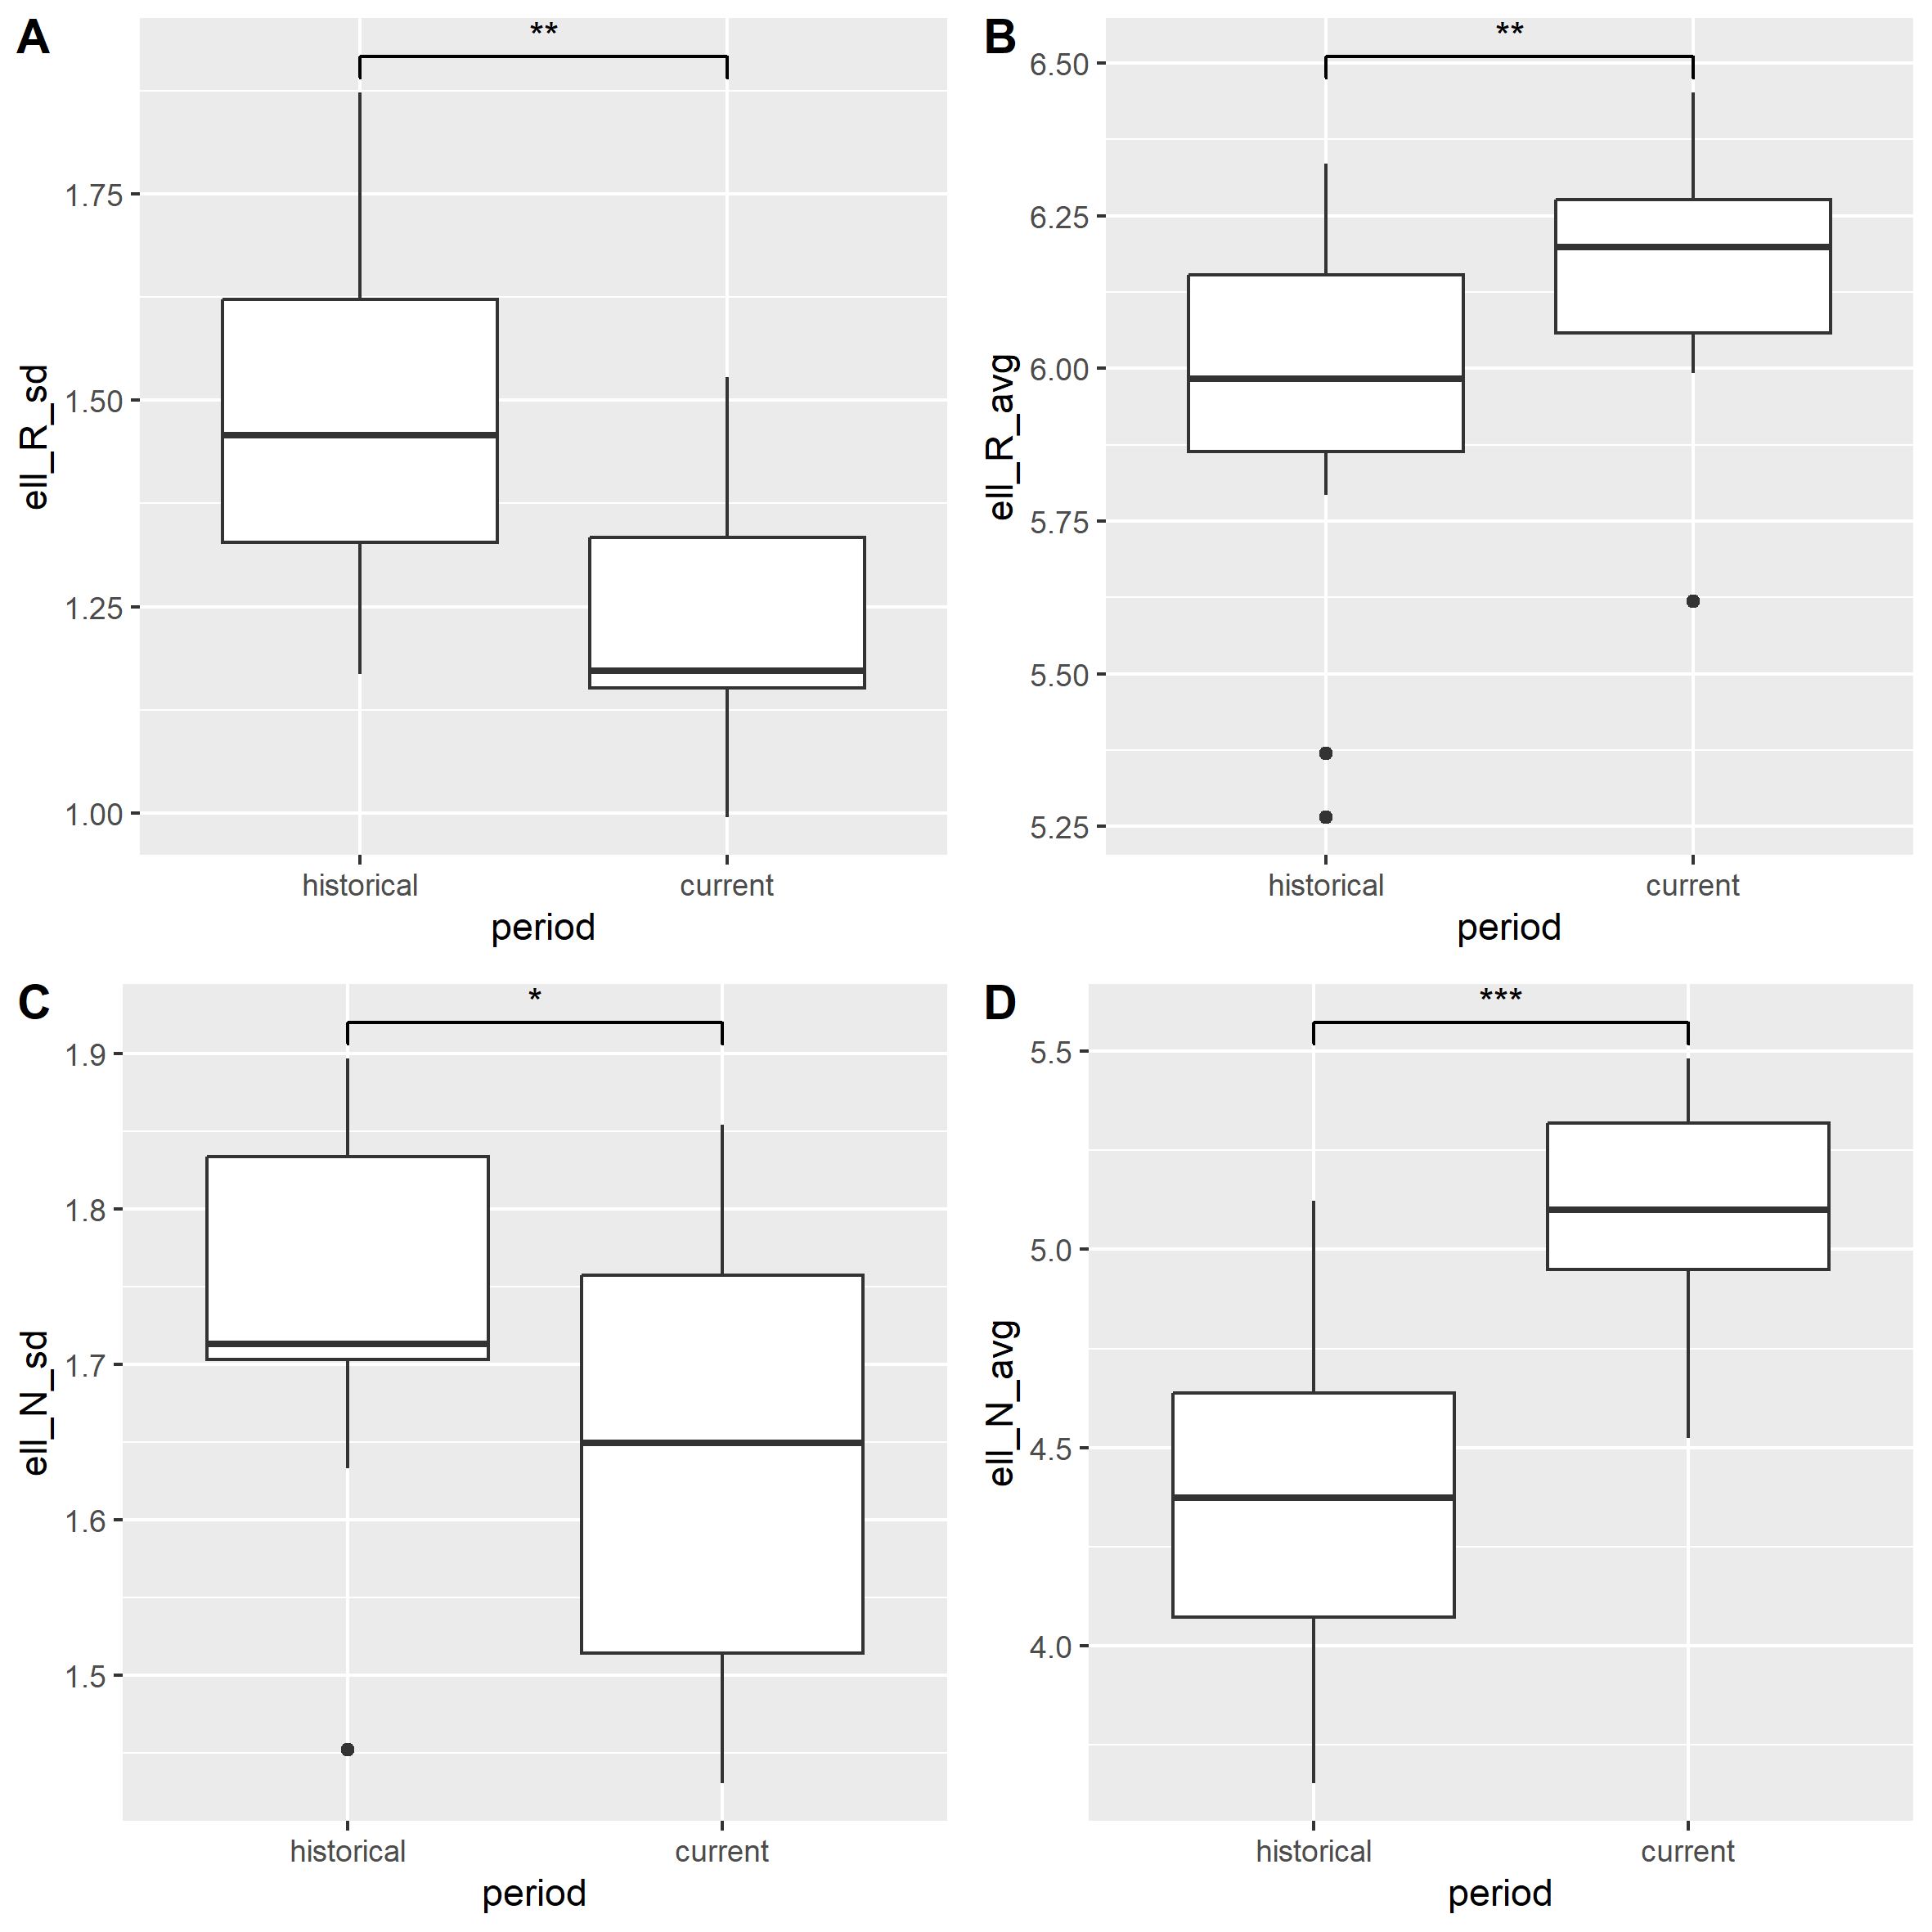
**

**Supplementary information S16: Ellenberg indicator values:** Historical and current locality mean Ellenberg values (_avg) and mean Ellenberg standard deviation (_sd) based on plant species lists in the 11 localities. A: variation in Ellenberg L (ell_L_sd), B: mean Ellenberg L (ell_L_avg), C: variation in Ellenberg N (ell_F_sd), and D: mean Ellenberg N (ell_F_avg).

**
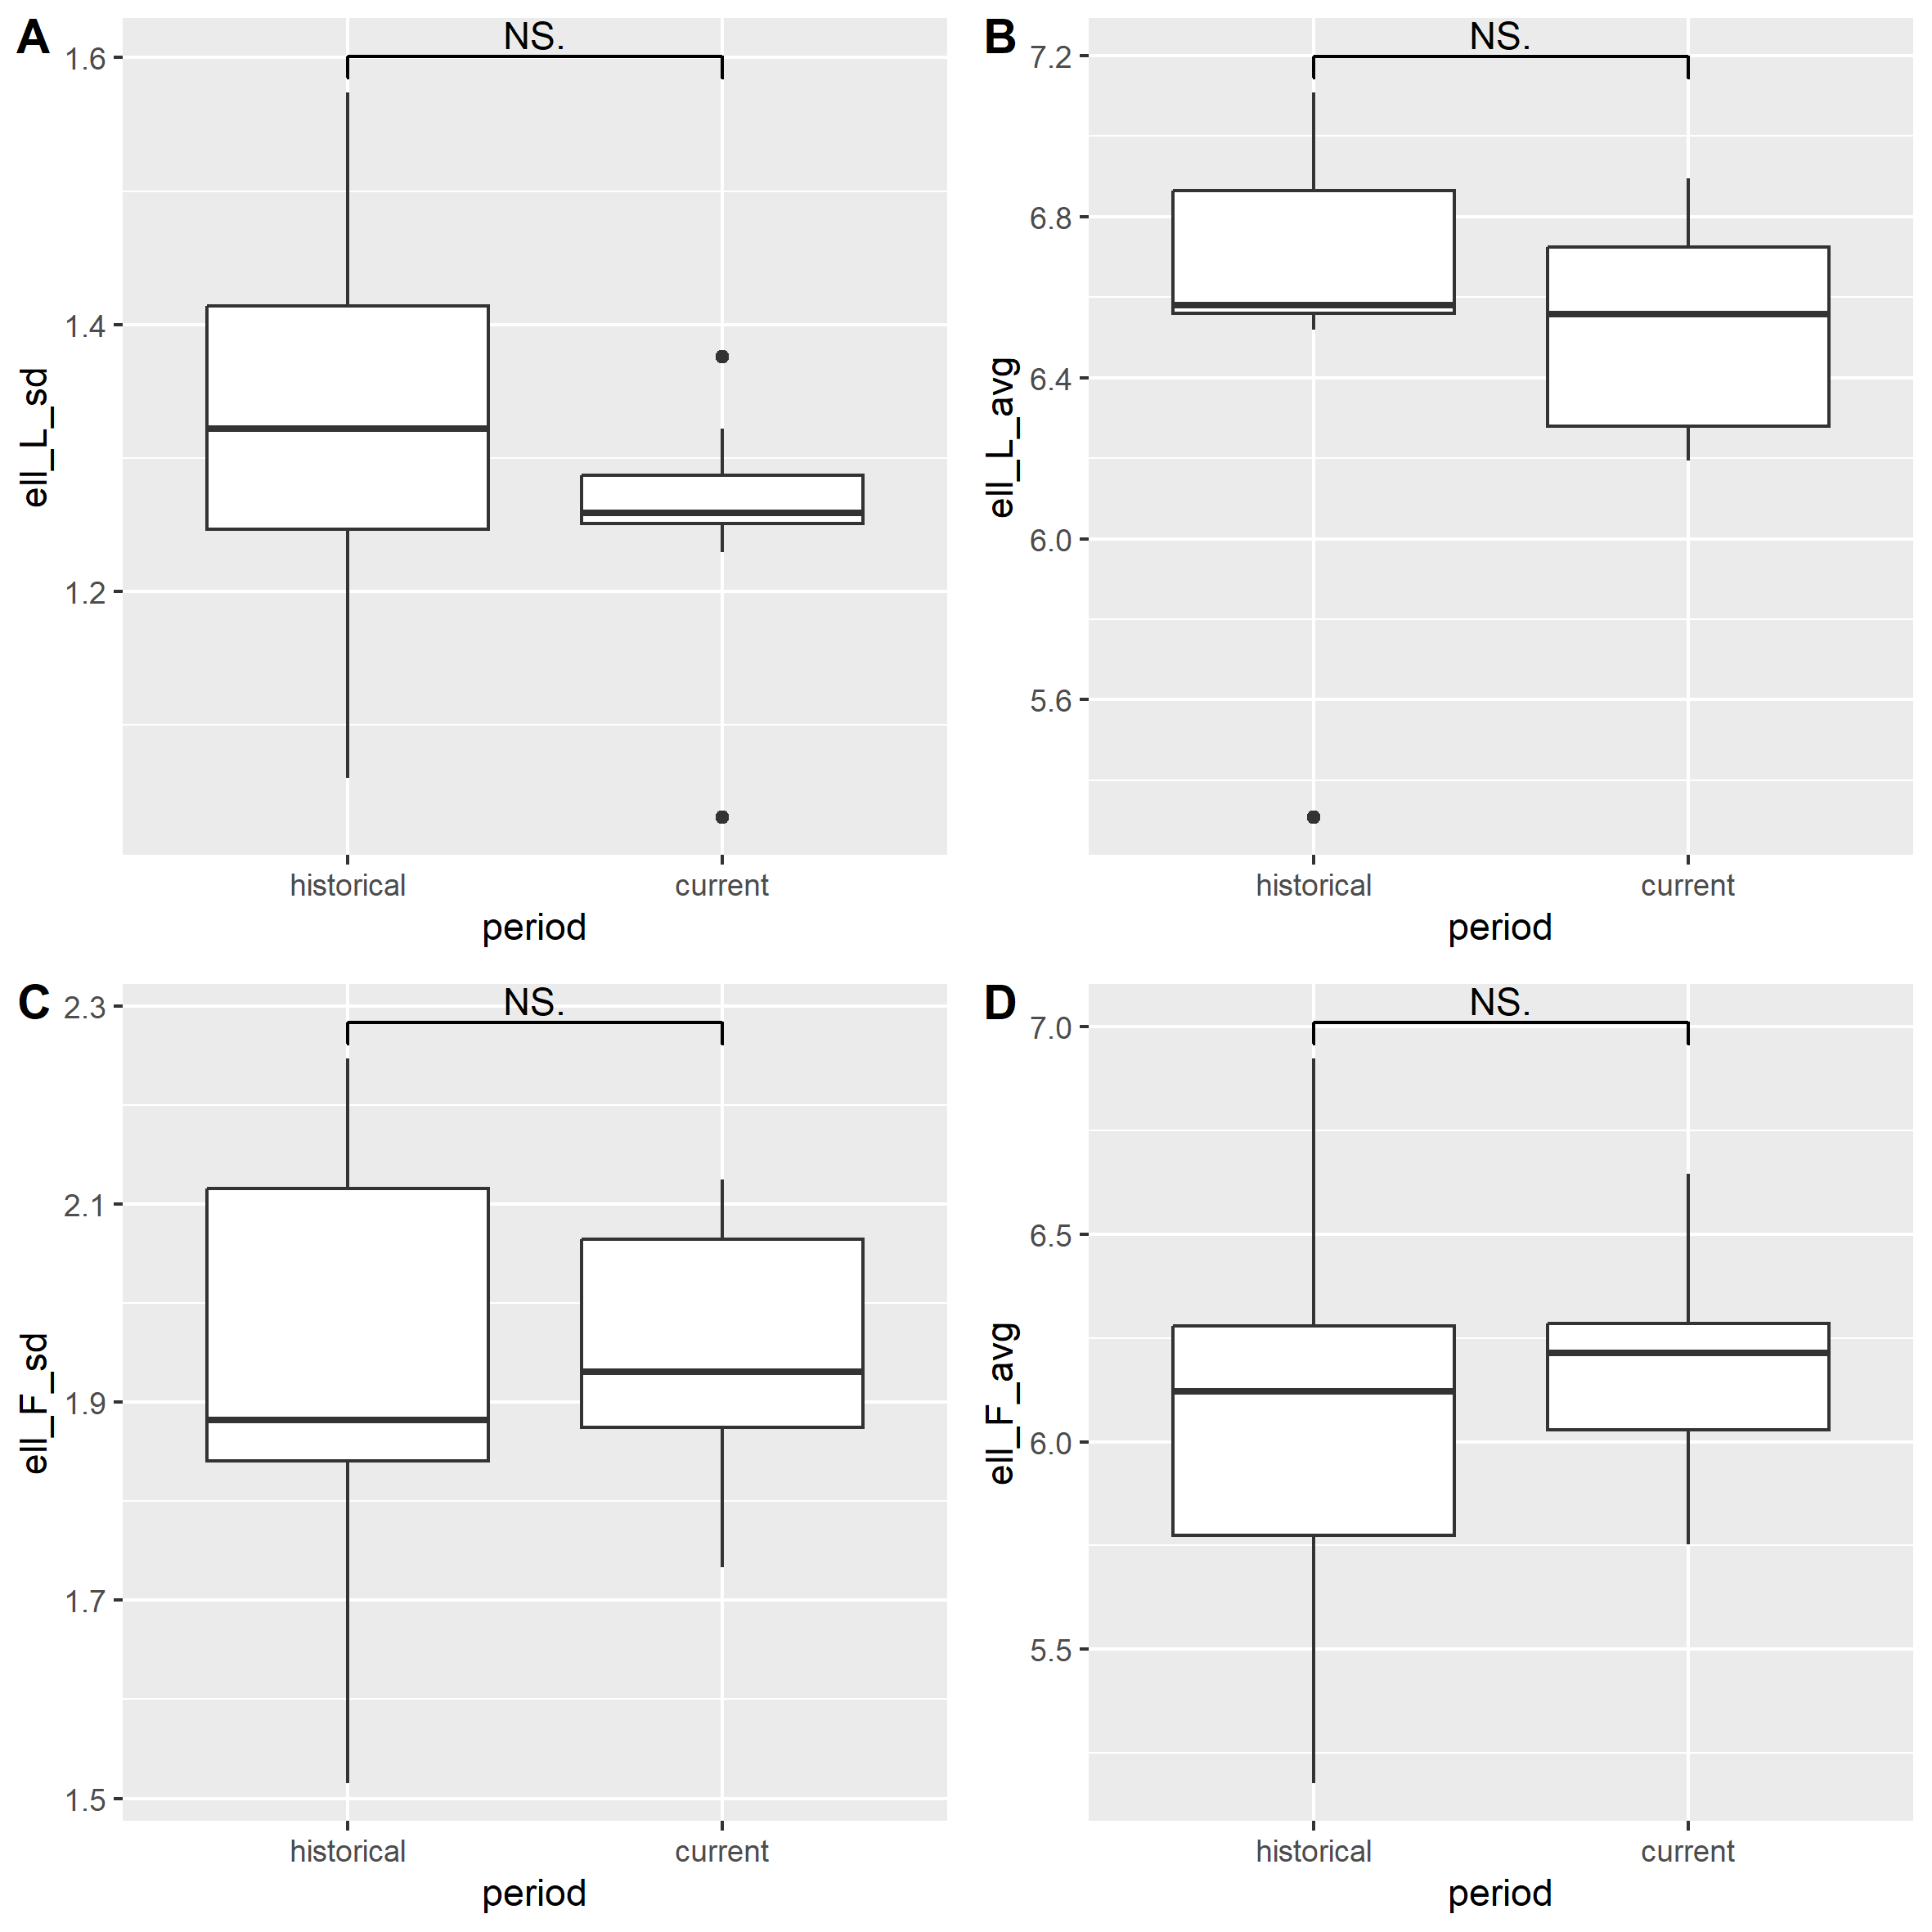
**

**Supplementary information S17: Land-use:** Historical and current locality mean area for different land-use categories for the 11 localities. A: area with rotational field, B: built-up area, C: forest area, and D: fallow area.

**
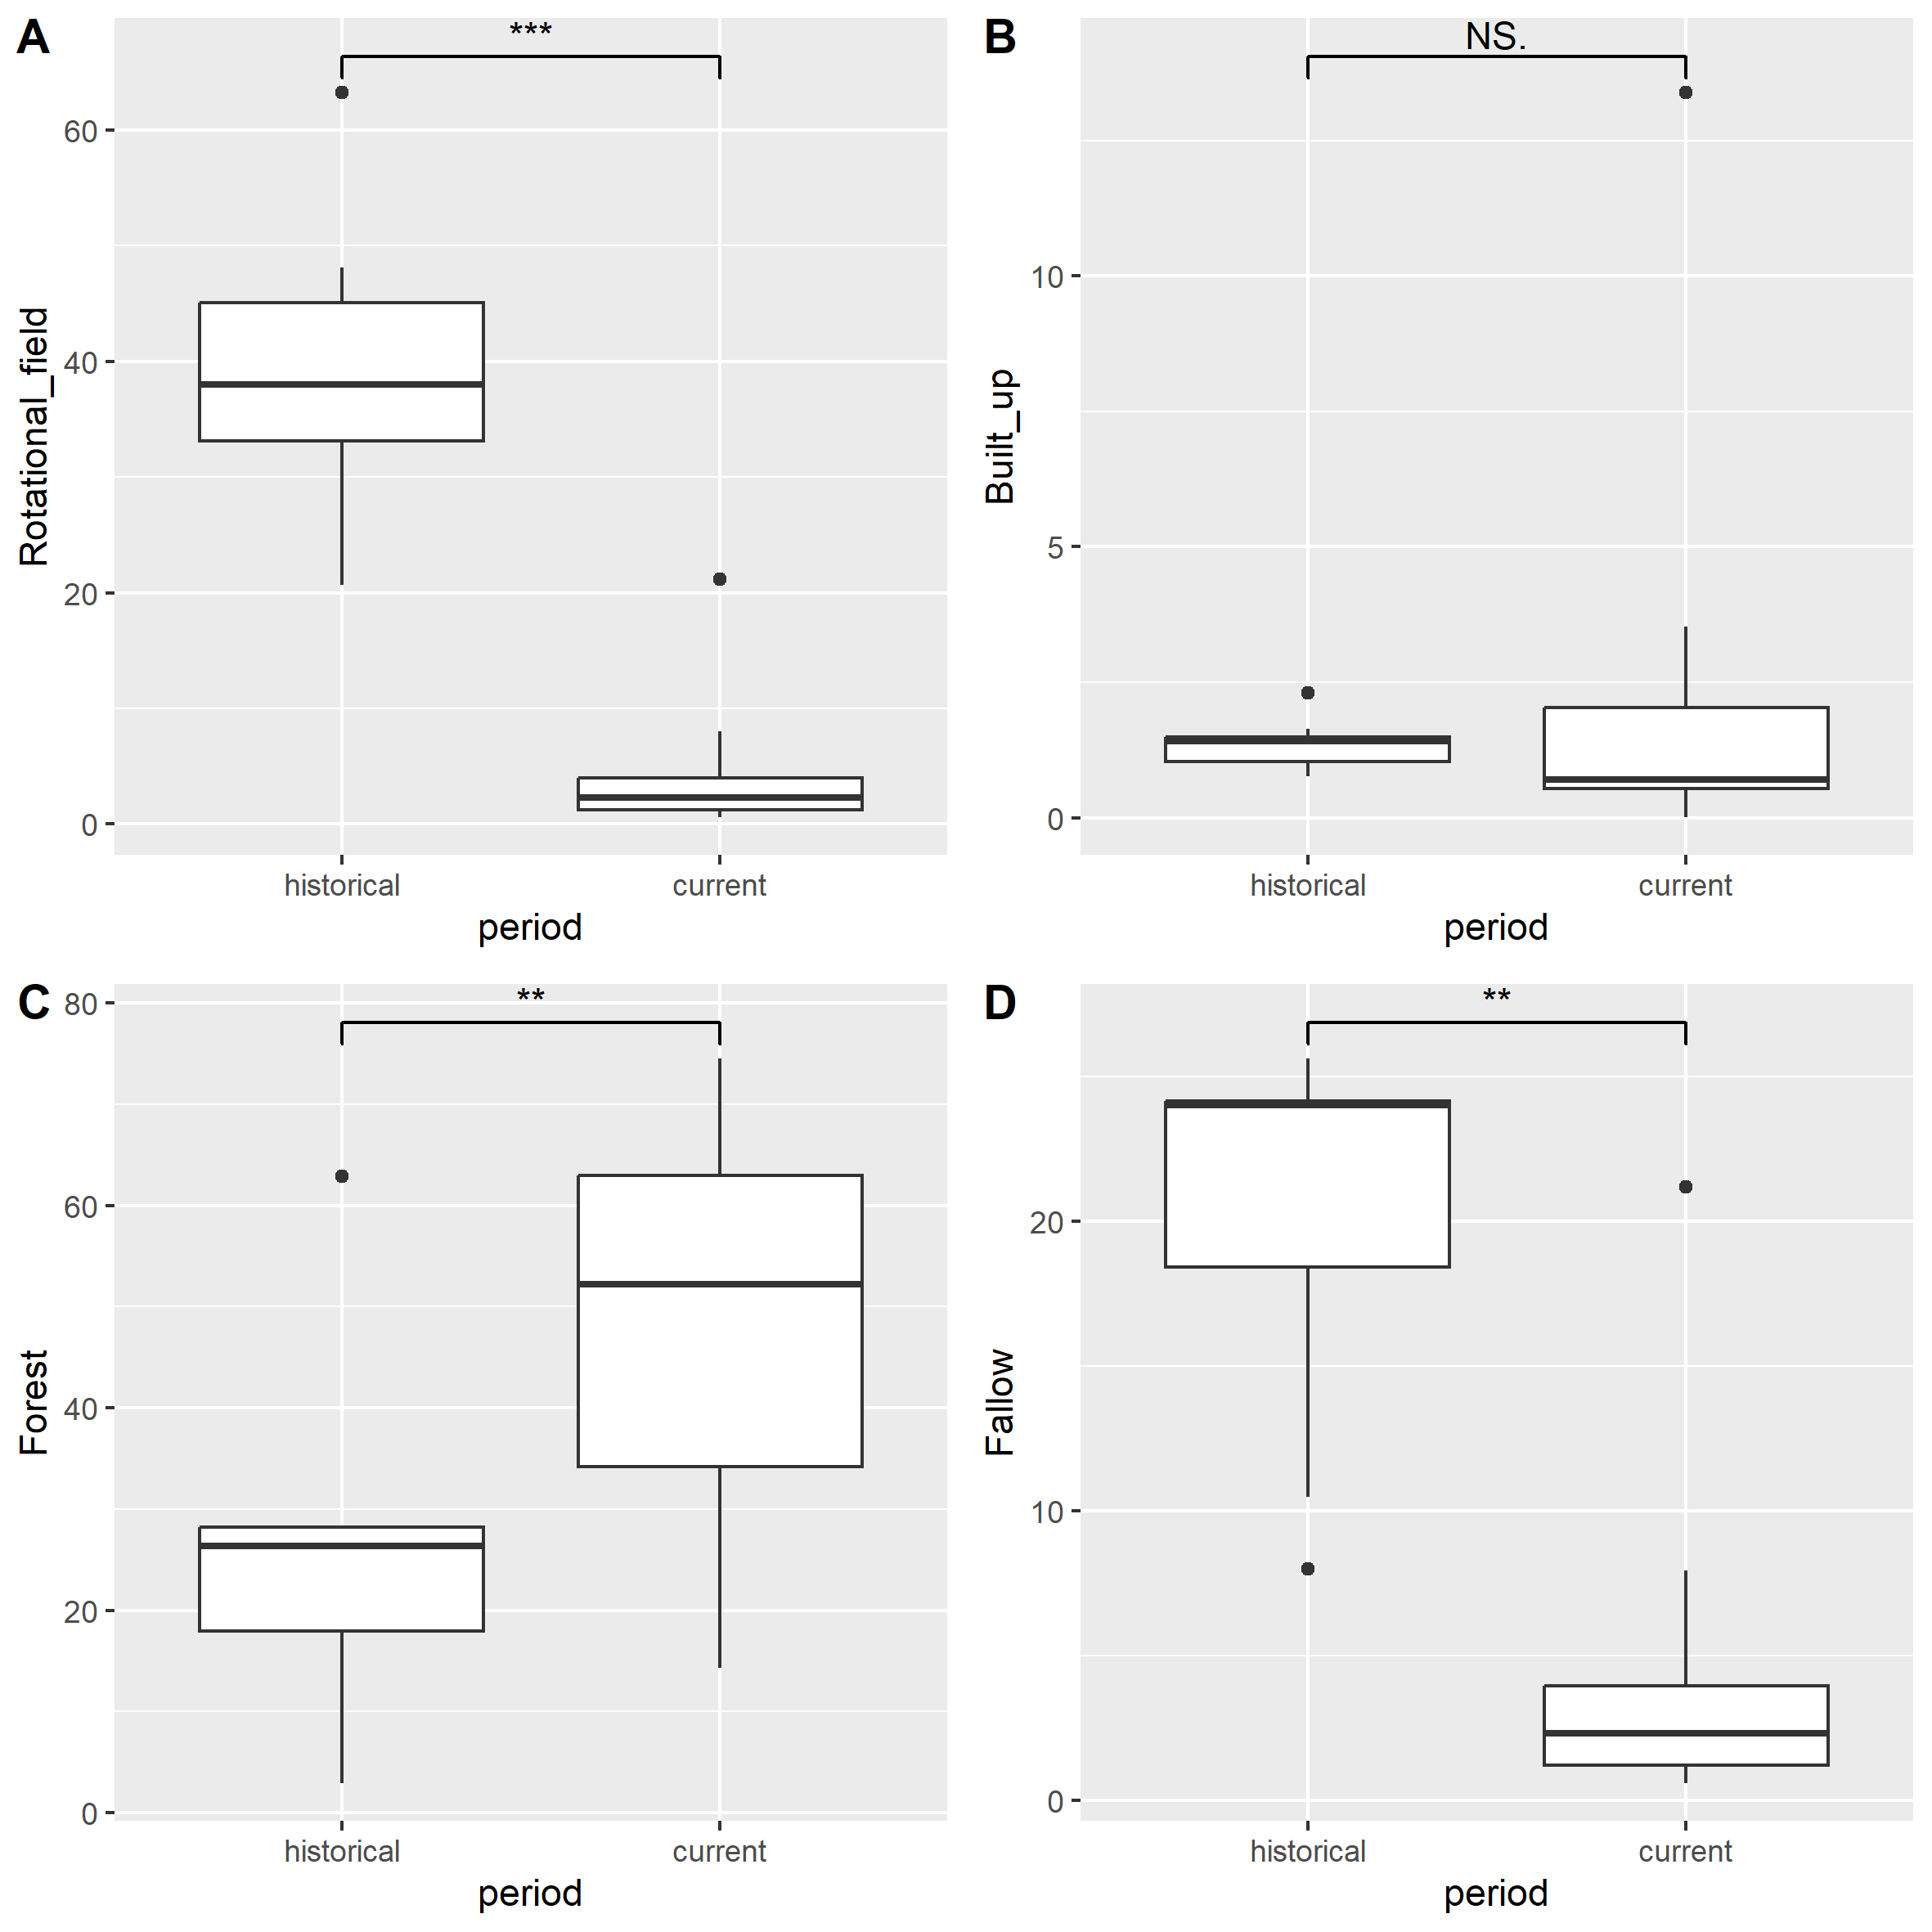
**

**Supplementary information S18: Land-use:** Historical and current locality mean area for different land-use categories and grazing density for the 11 localities. A: mean grazing density (kg/ha), B: meadow area, C: mire area, and D: grassland area.

**
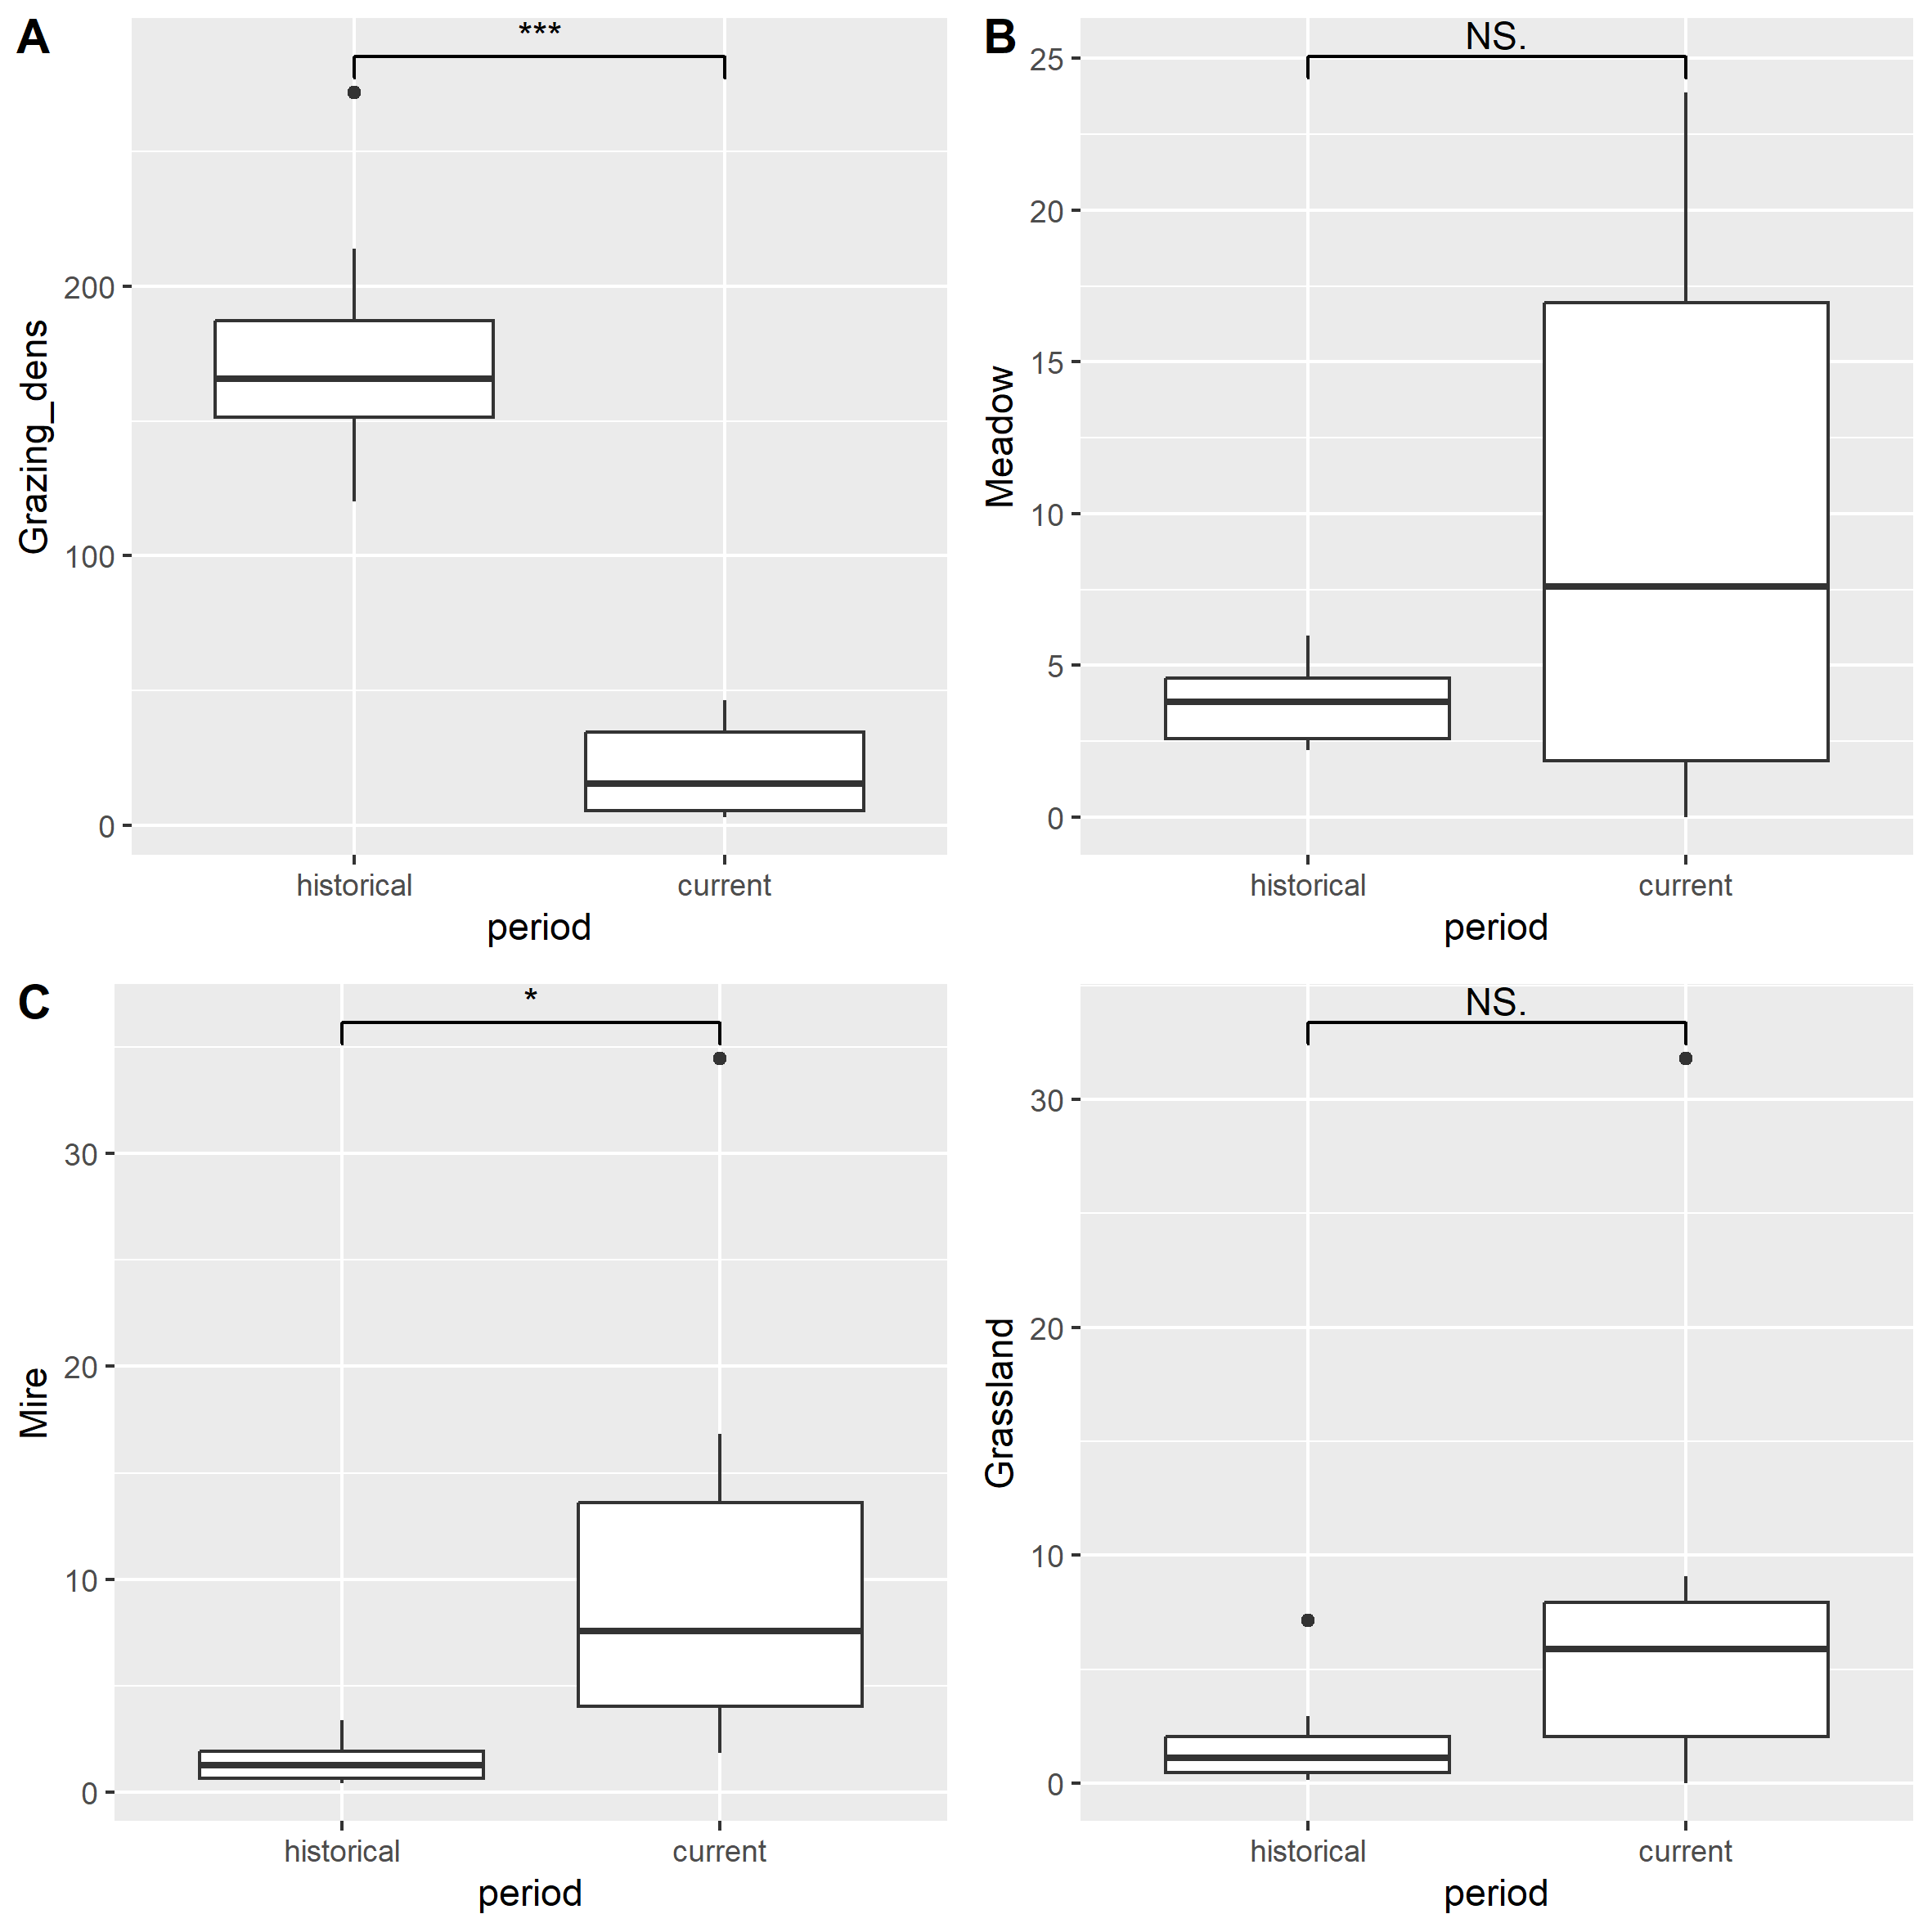
**
